# Supplementary material for: SAR studies of 3,14,19-derivatives of andrographolide on anti-proliferative activity to cancer cells and toxicity to zebrafish: an in vitro and in vivo study
Source: Royal Society of Chemistry journal article supplement (doi:10.1039/c5ra00090d), 2015-01-01

SAR Studies of 3,14,19-Derivatives of Andrographolide on  
Anti-Proliferative Activity to Cancer Cells and Toxicity to Zebrafish: An  
*In Vitro* and *In Vivo* Study

Yuran Peng,<sup>a,1</sup> Jingjing Li,<sup>b,1</sup> Yicheng Sun,<sup>a</sup> Judy Yuet-Wa Chan,<sup>b</sup> Dekuan Sheng,<sup>a</sup> Kun Wang,<sup>a</sup>  
Ping Wei,<sup>c</sup> Pingkai Ouyang,<sup>c</sup> Decai Wang,<sup>a,\*</sup> Simon Ming Yuen Lee,<sup>b,\*</sup> Guo-Chun Zhou<sup>a,\*</sup>

<sup>a</sup> School of Pharmaceutical Sciences, Nanjing Tech University, Nanjing 211816, Jiangsu, China

<sup>b</sup> State Key Laboratory of Quality Research in Chinese Medicine and Institute of Chinese Medical Sciences,  
University of Macau, Macao, China

<sup>c</sup> College of Biotechnology and Pharmaceutical Engineering, Nanjing Tech University, Nanjing 211816, Jiangsu,  
China

<sup>1</sup> These authors contributed equally to this paper.

\* Corresponding Authors: [dcwang@njtech.edu.cn](mailto:dcwang@njtech.edu.cn) (dw); [simonlee@umac.mo](mailto:simonlee@umac.mo) (sl); [gczhou@njtech.edu.cn](mailto:gczhou@njtech.edu.cn) (gcz)

**Contents**

(1) <sup>1</sup>H NMR and <sup>13</sup>C NMR spectra of compounds **4a/b** to **25b/25b**-----pp2-45

<sup>1</sup>H NMR of compound **4a**:

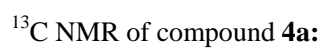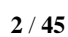

<sup>1</sup>H NMR of compound **4b**:

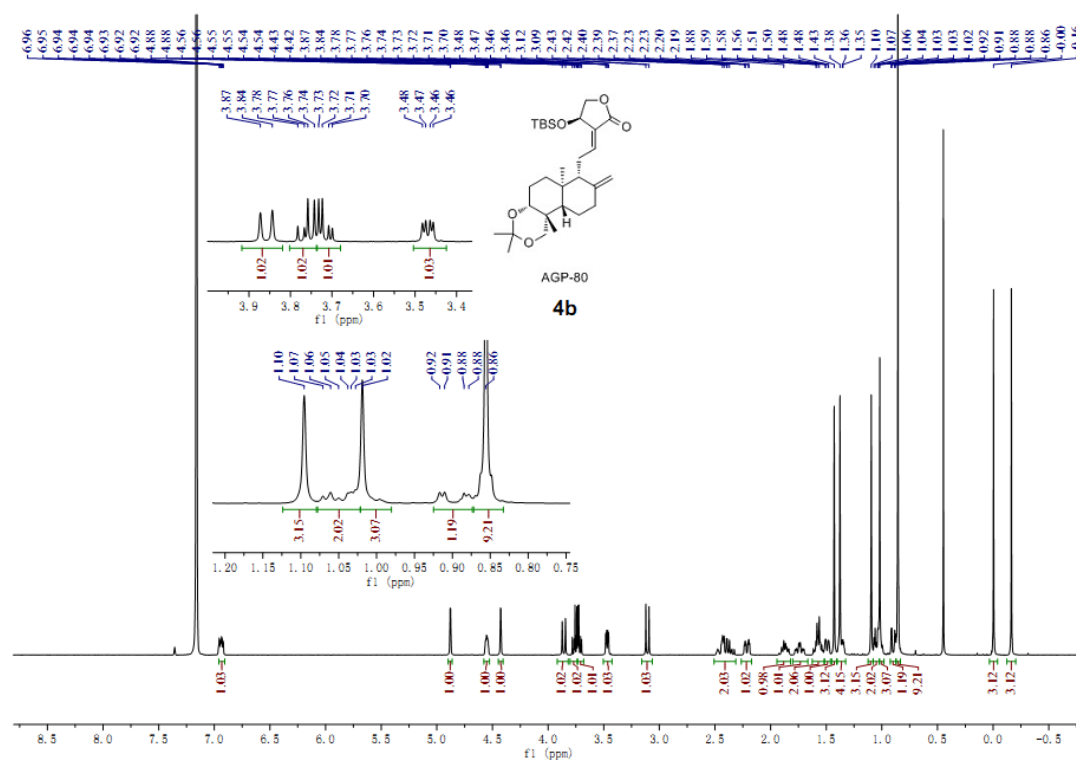

<sup>13</sup>C NMR of compound **4b**:

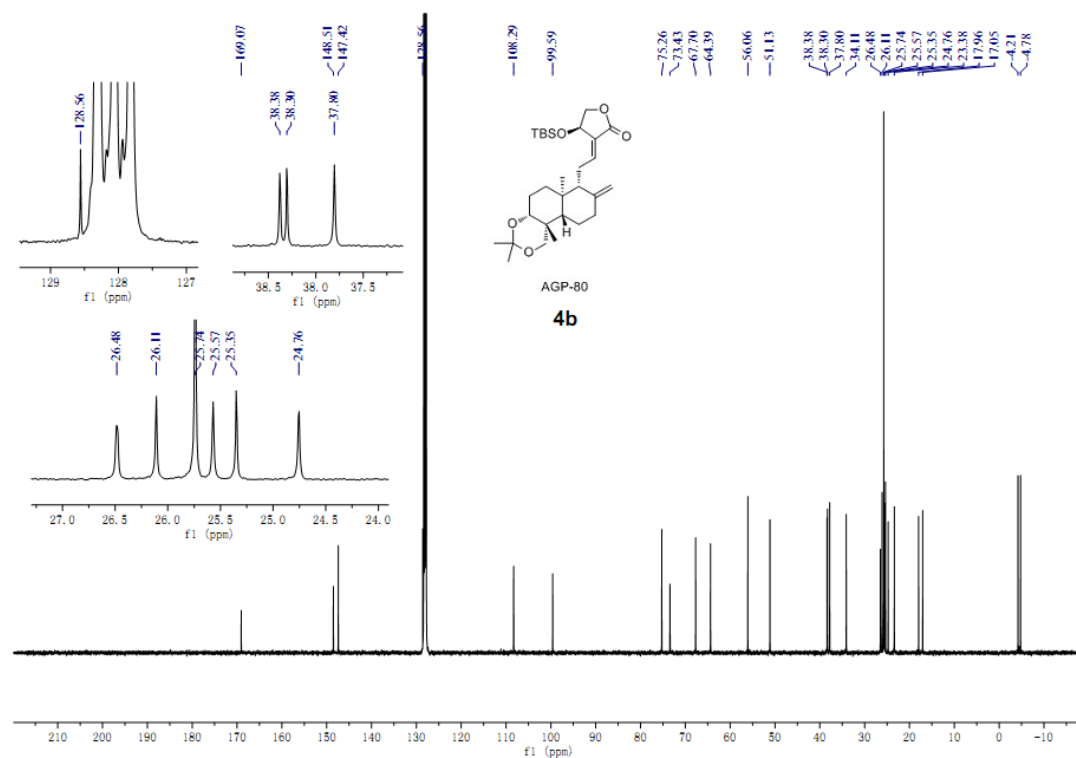

<sup>1</sup>H NMR of compound **5a**:

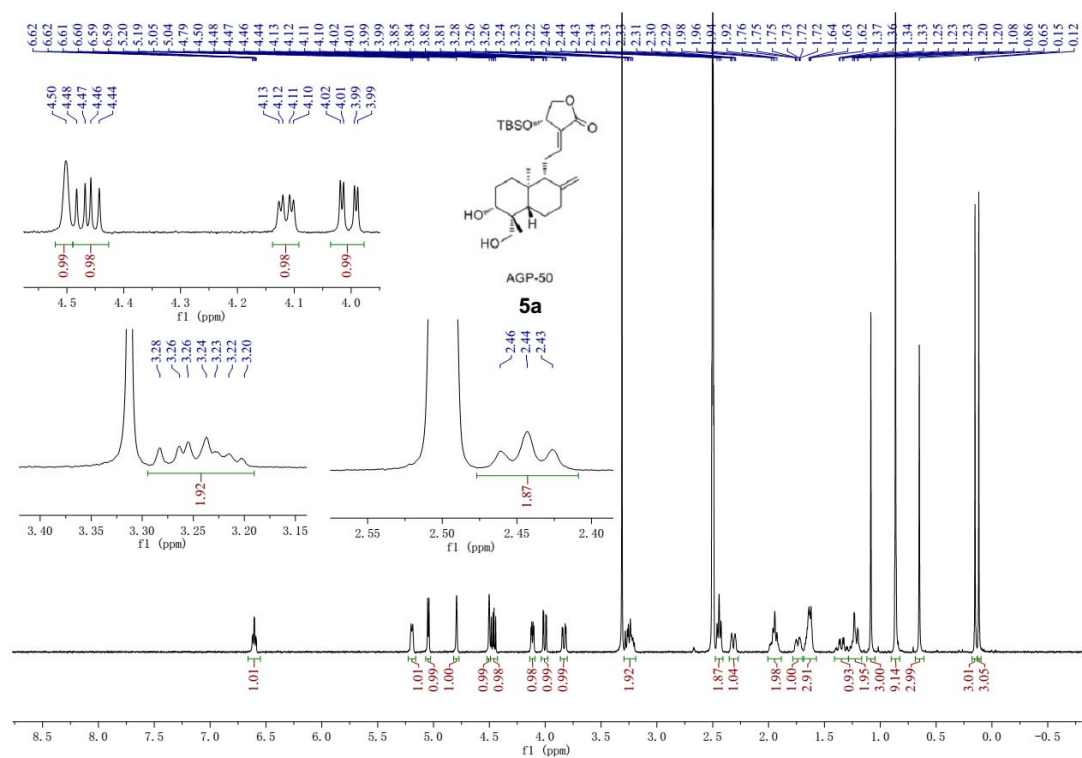

<sup>1</sup>H NMR of compound **5b**:

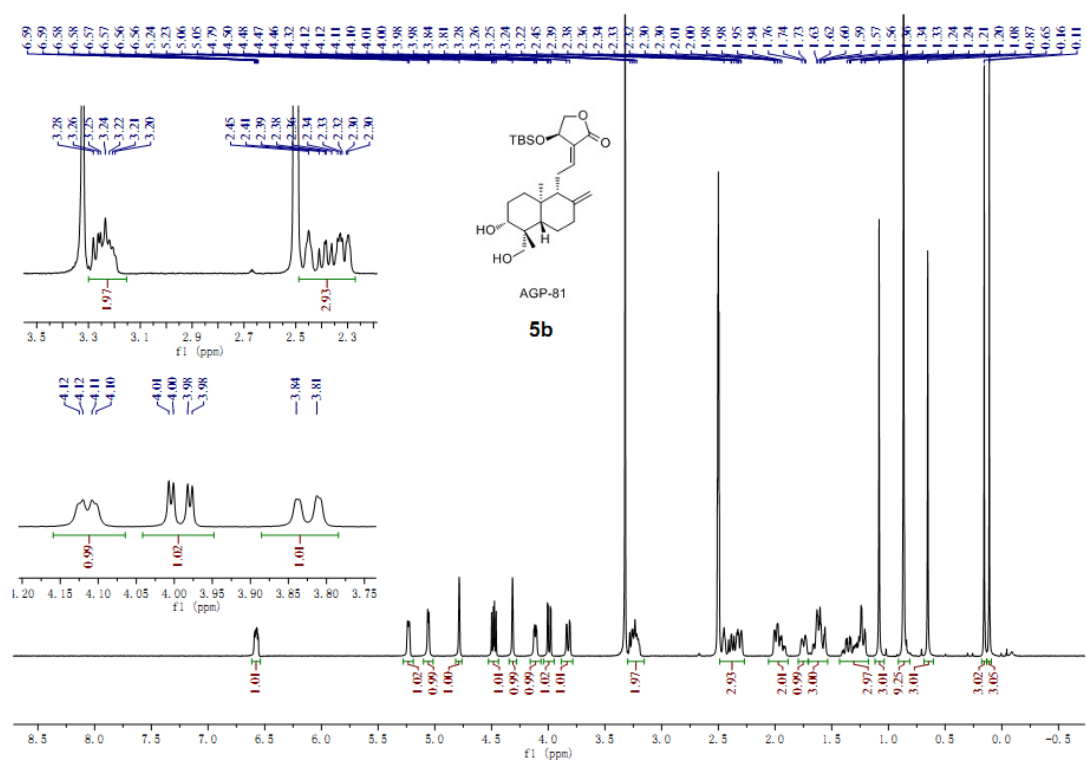

<sup>13</sup>C NMR of compound **5b**:

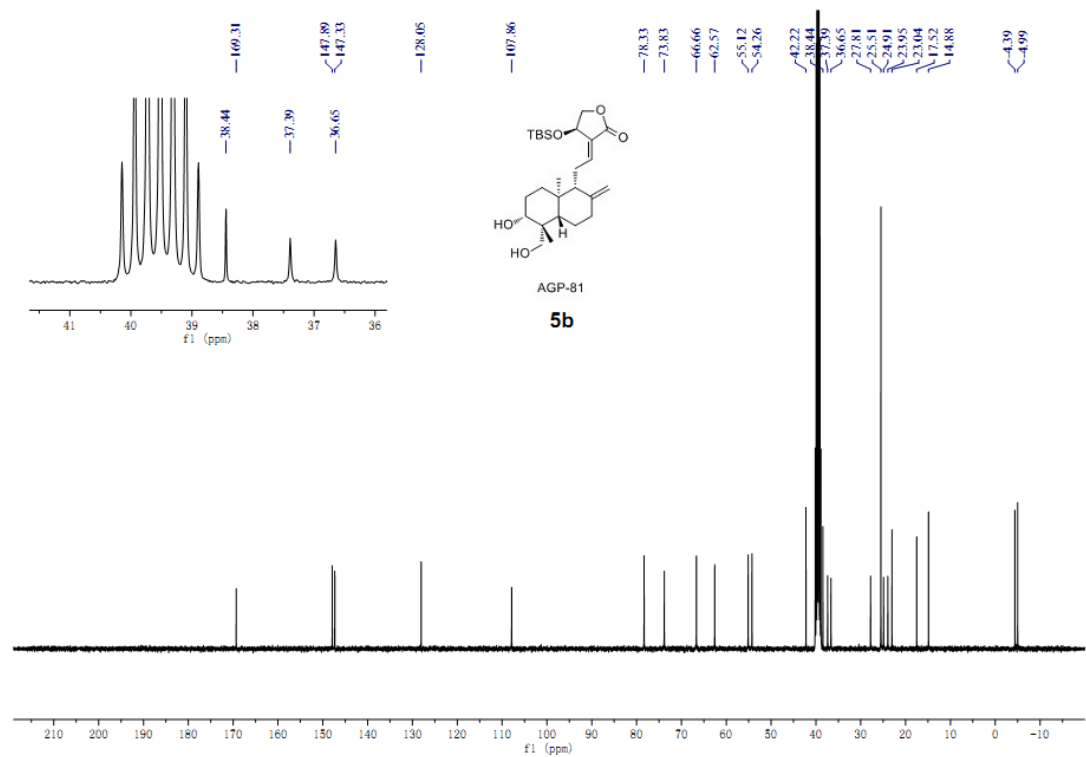

<sup>1</sup>H NMR of compound **6a**:

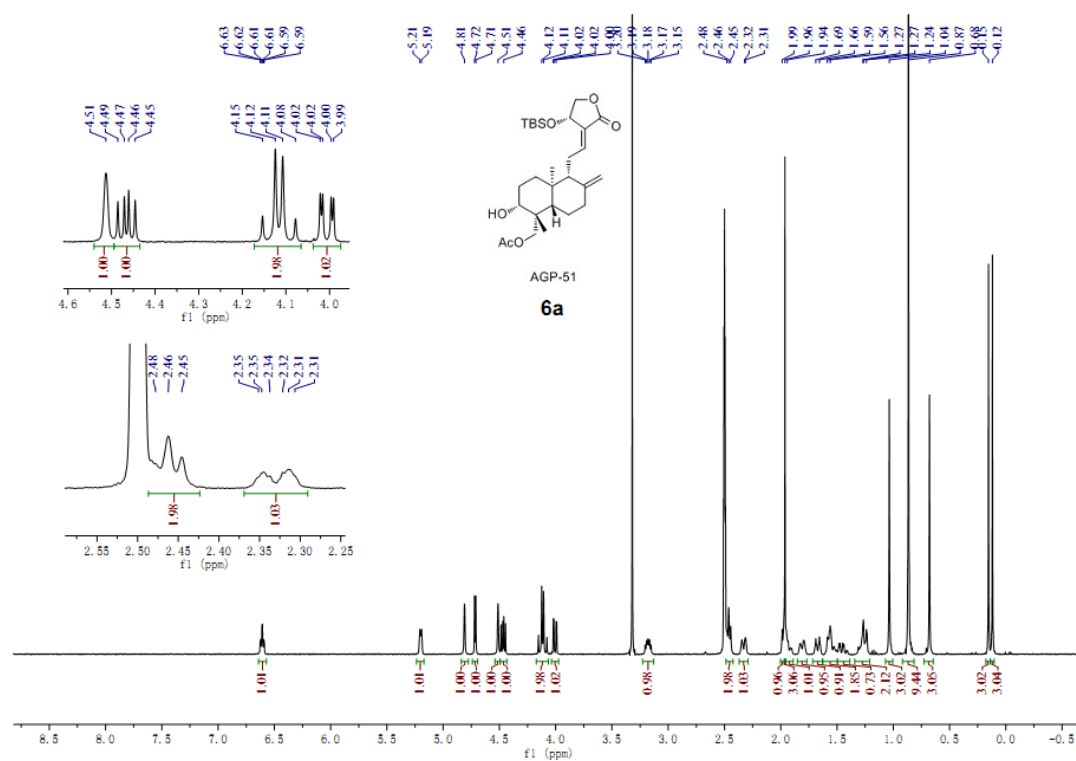

<sup>13</sup>C NMR of compound **6a**:

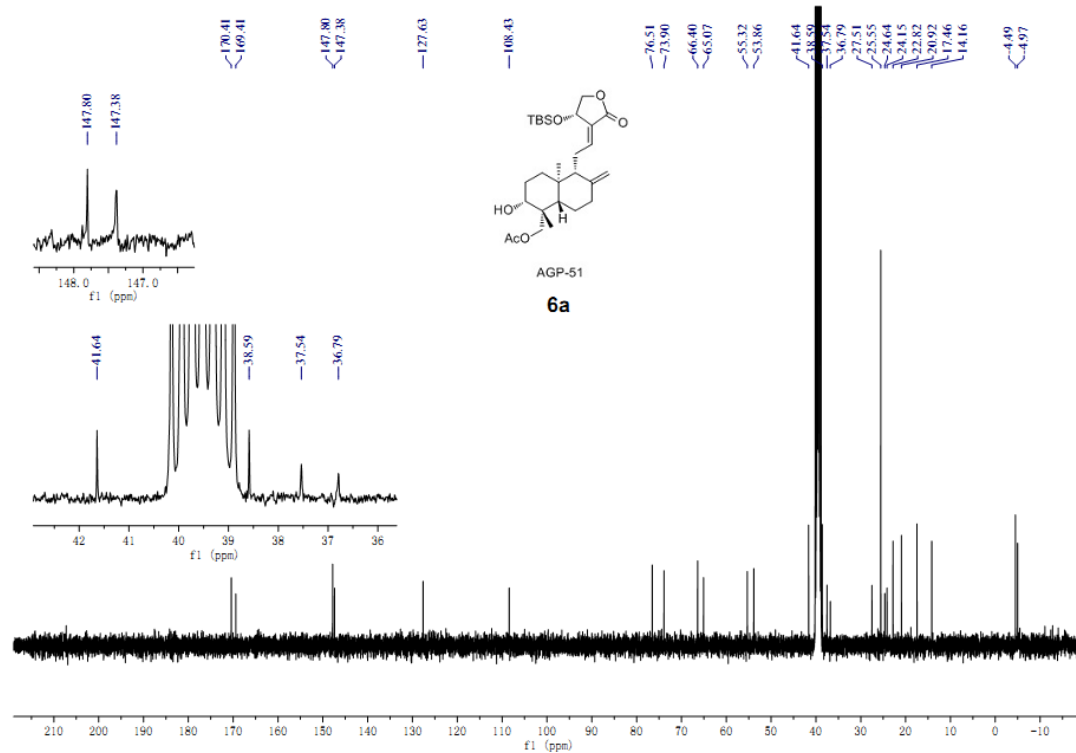

<sup>1</sup>H NMR of compound **6b**:

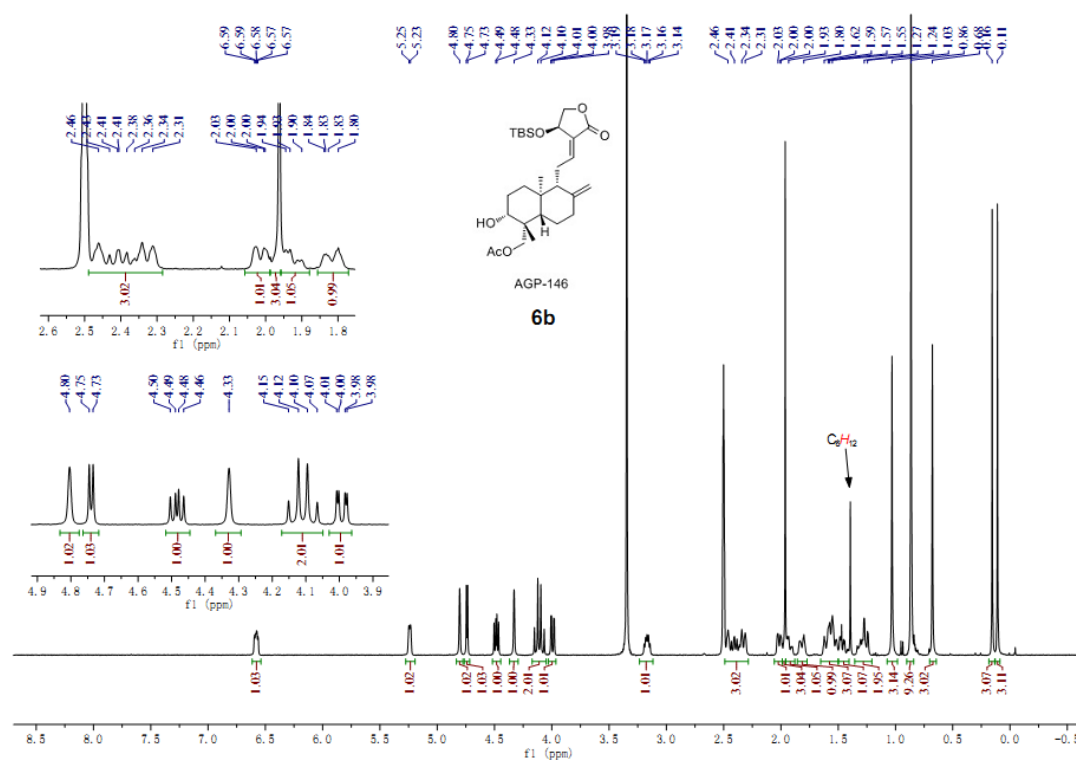

<sup>13</sup>C NMR of compound **6b**:

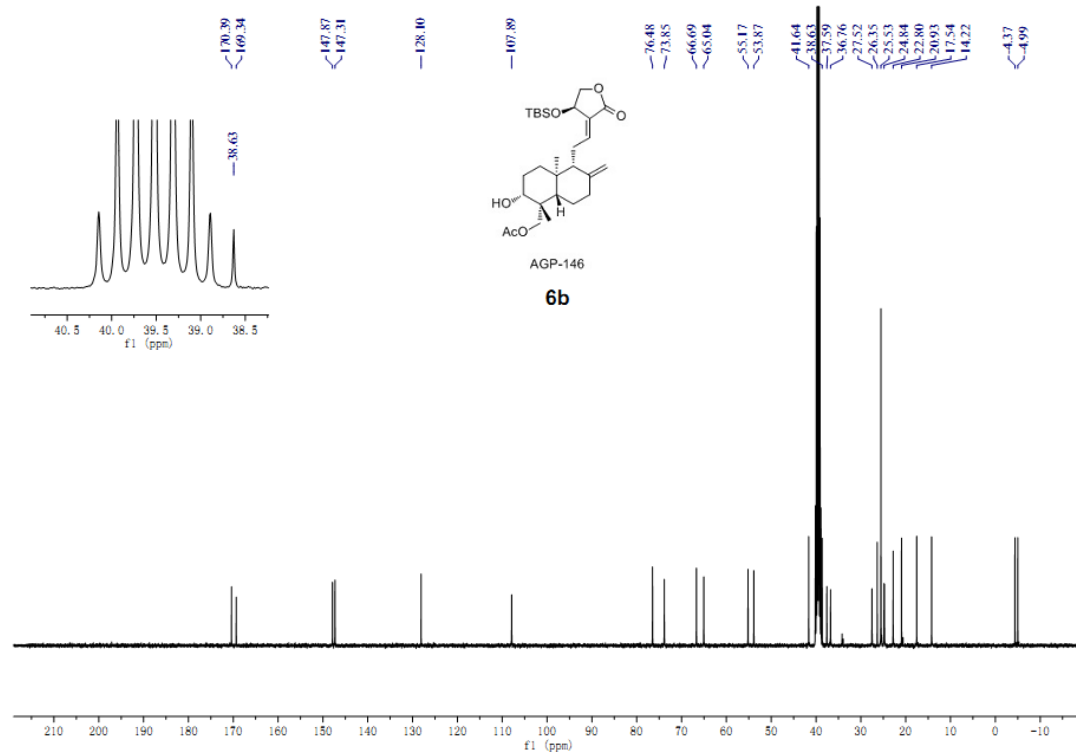

<sup>1</sup>H NMR of compound **7a**:

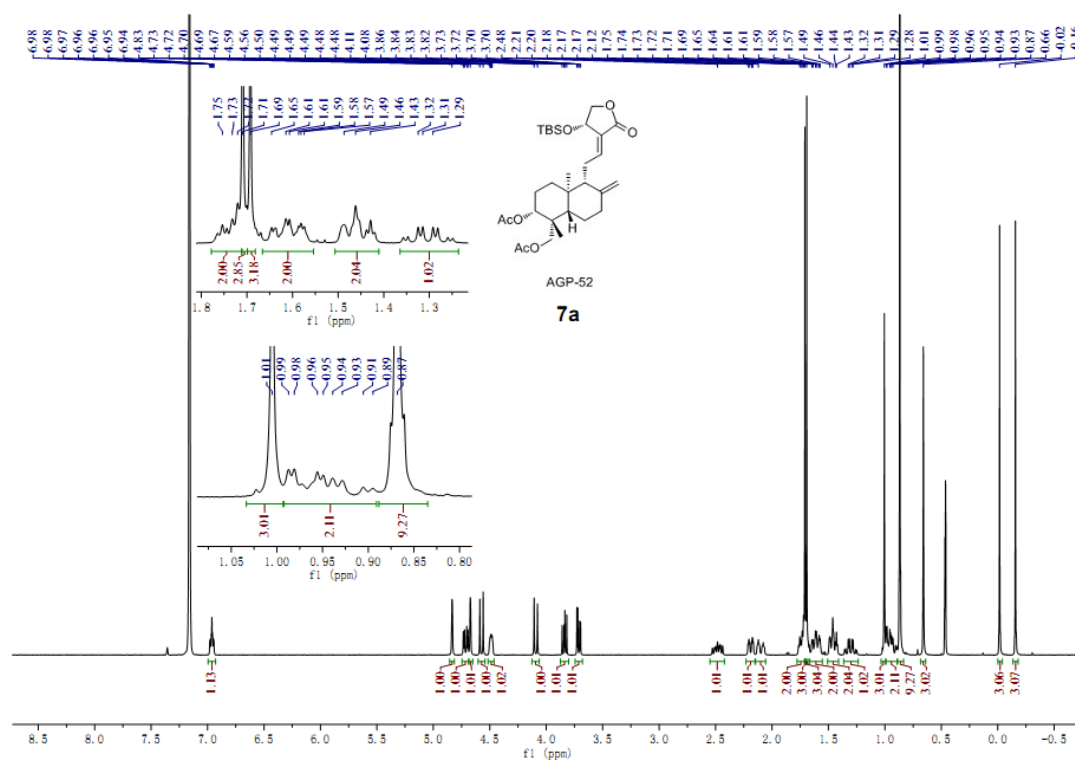

<sup>13</sup>C NMR of compound **7a**:

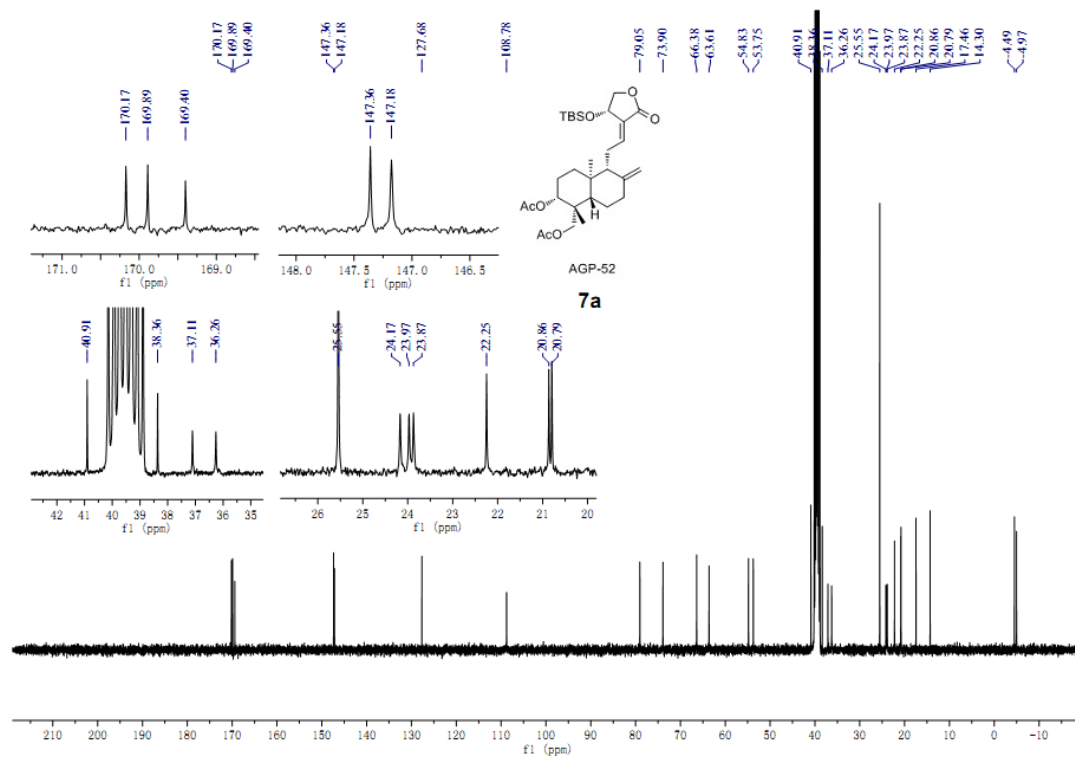



<sup>1</sup>H NMR of compound **7b**:

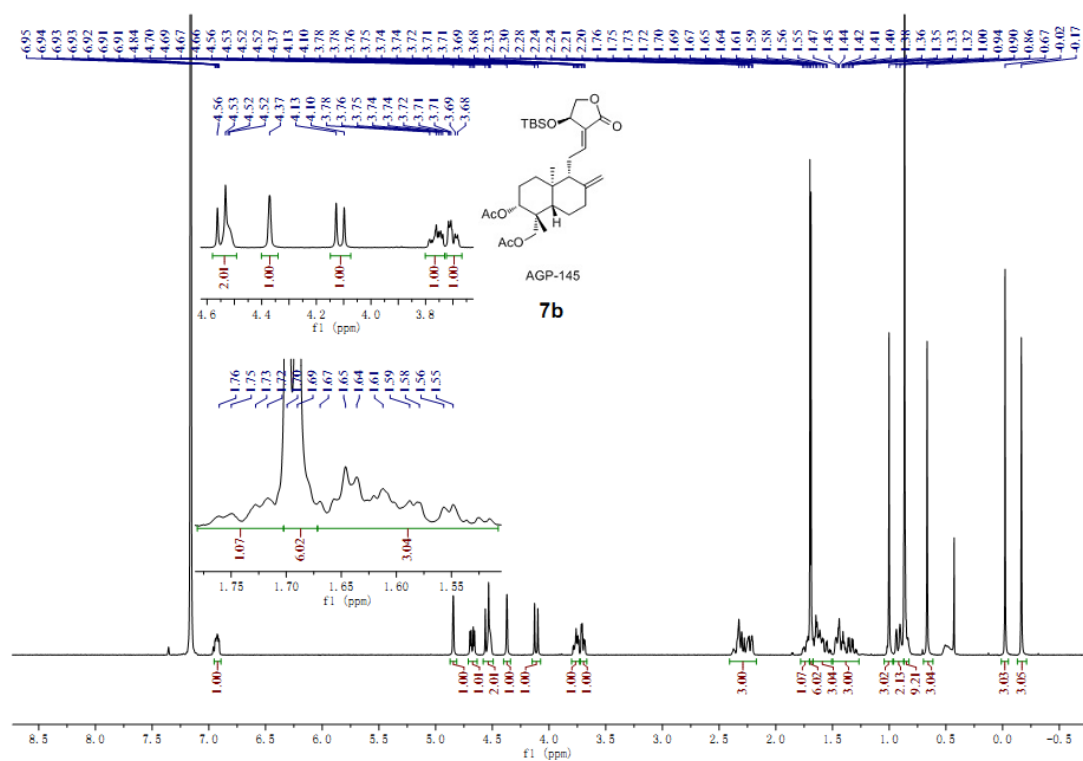 $^{13}\text{C}$  NMR of compound **7b**: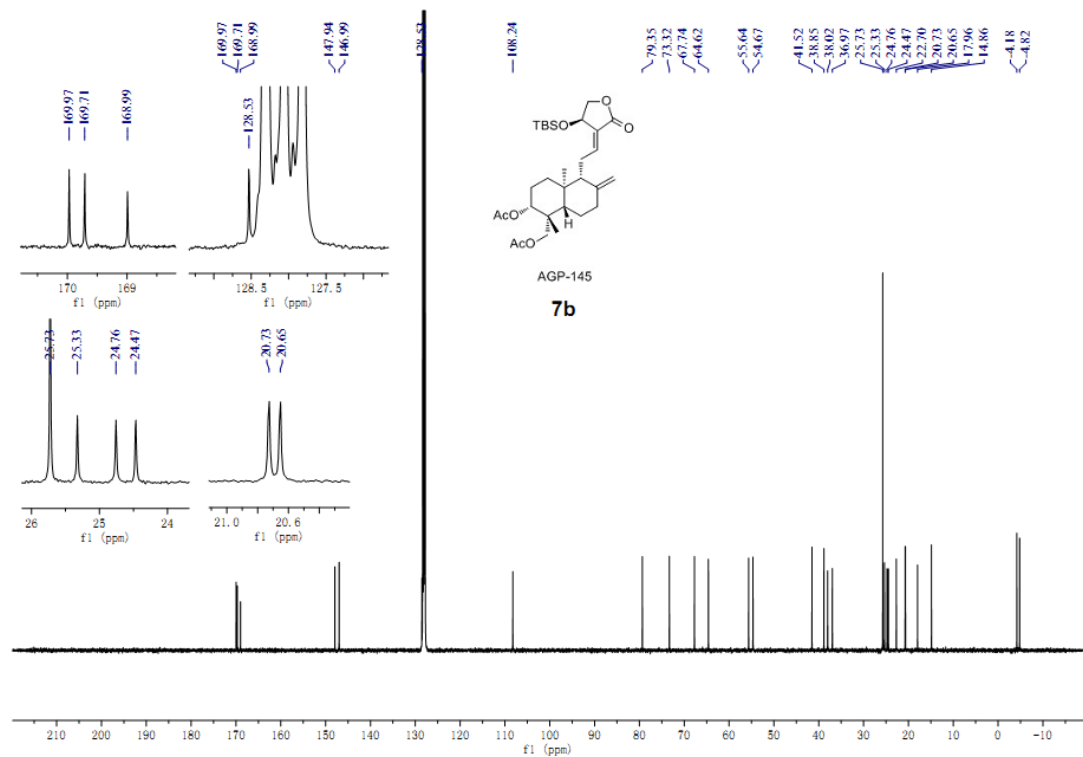

<sup>1</sup>H NMR of compound **8a**:

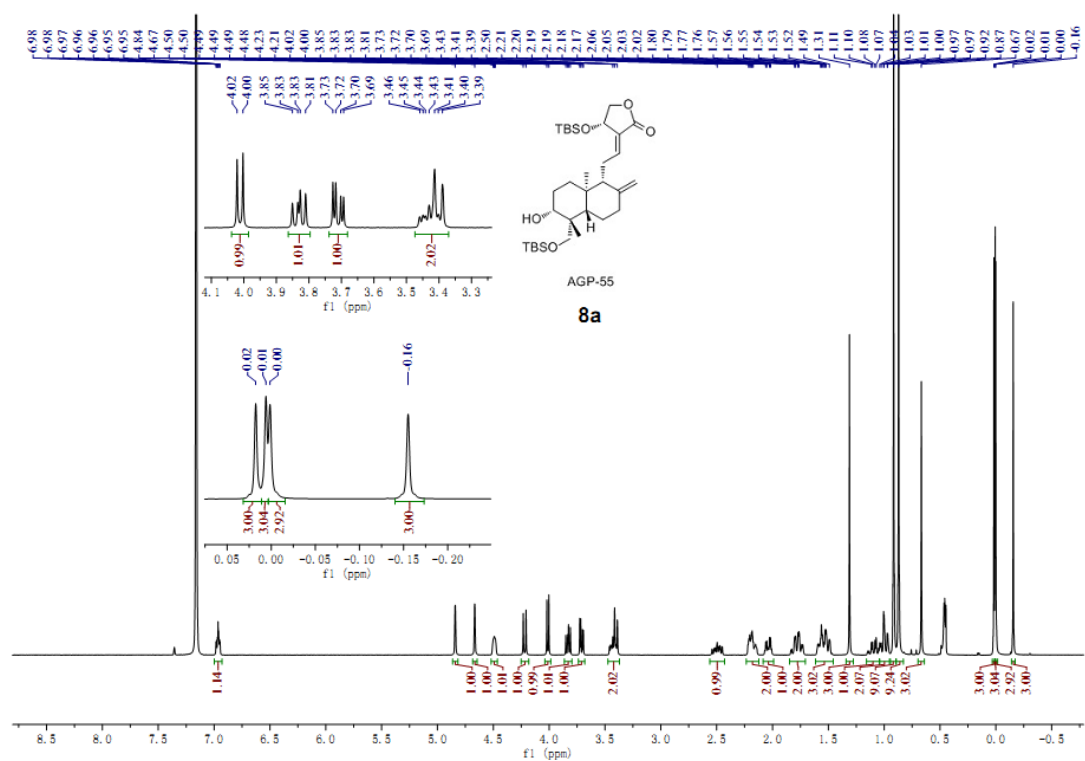 $^{13}\text{C}$  NMR of compound **8a**: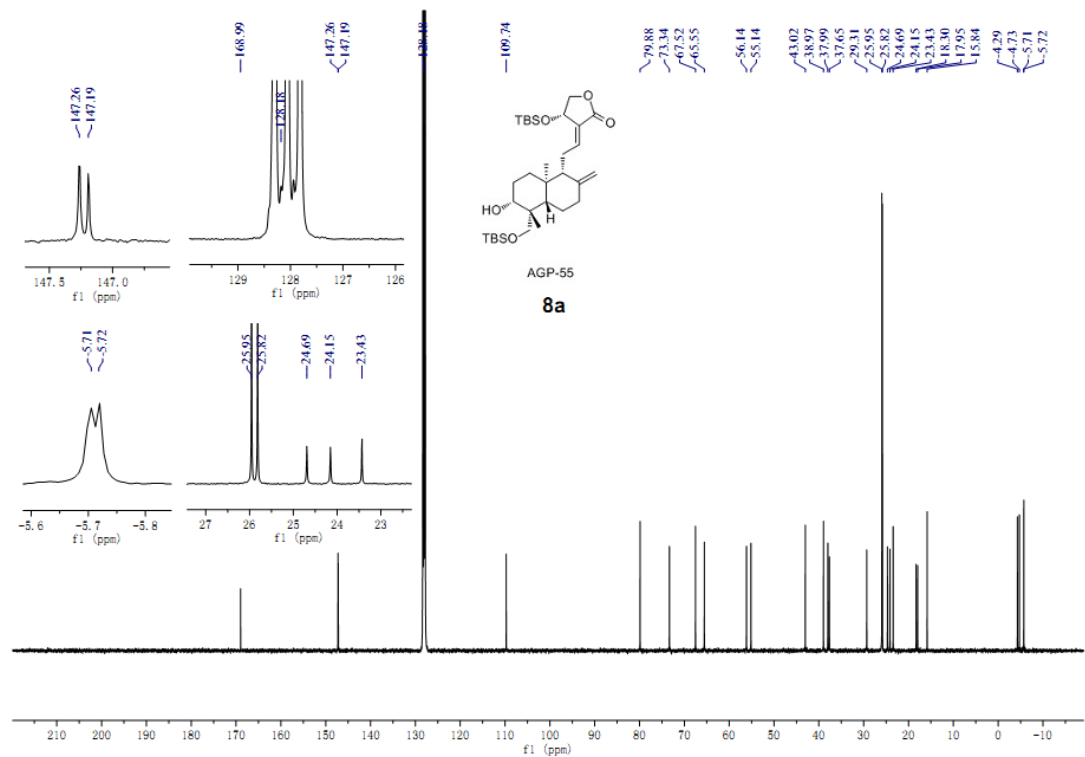

<sup>1</sup>H NMR of compound **8b**:

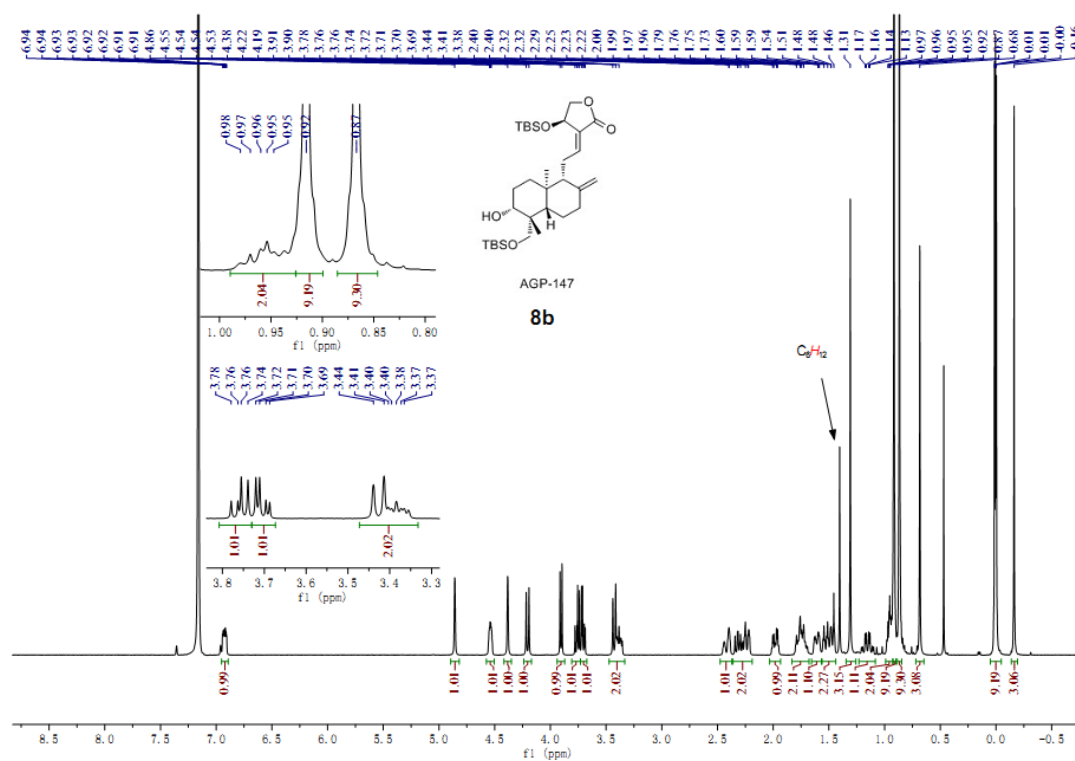

<sup>13</sup>C NMR of compound **8b**:

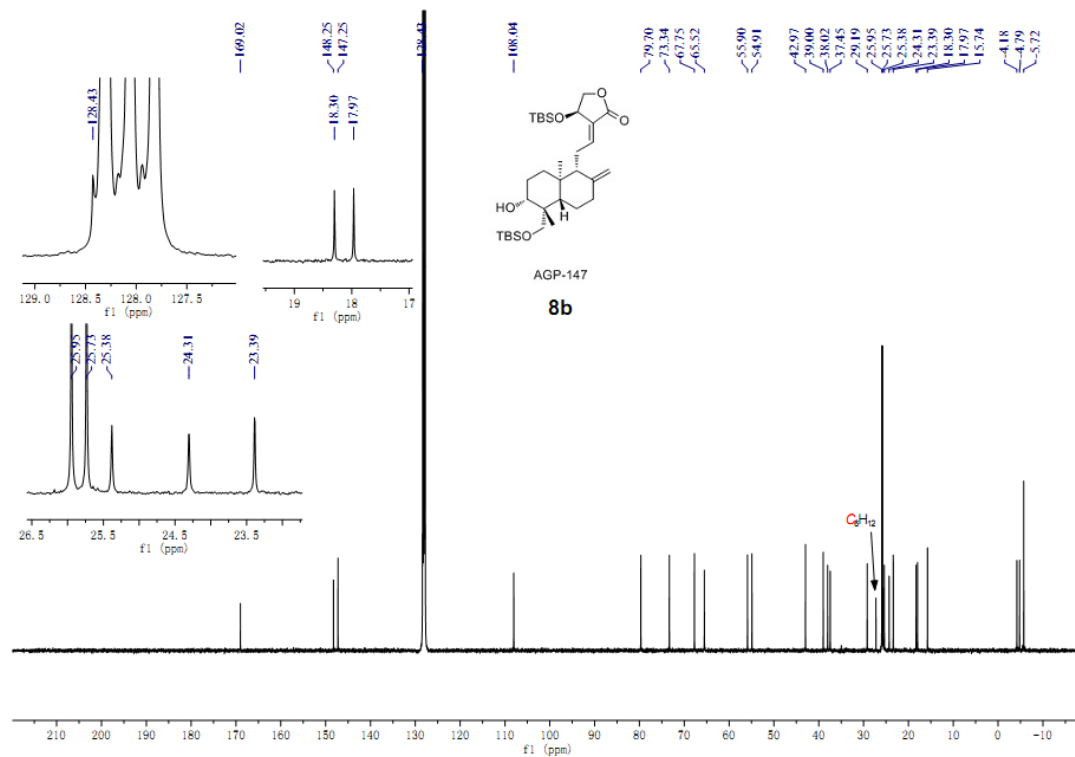

<sup>1</sup>H NMR of compound **9a**:

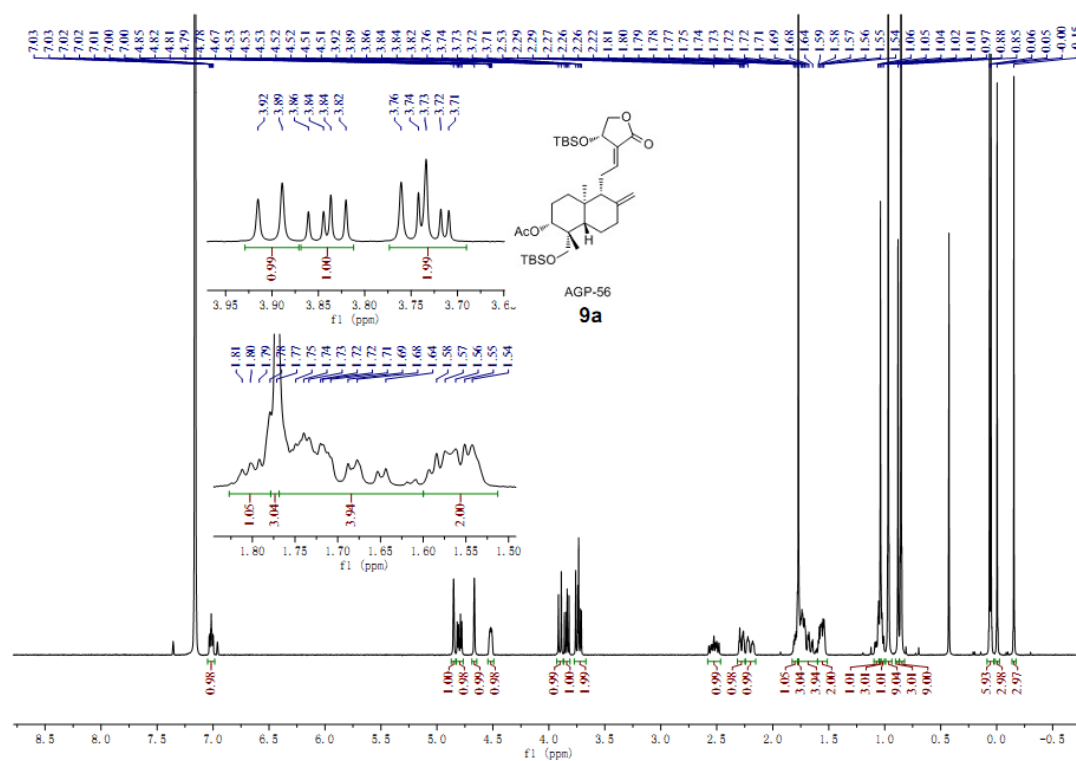 $^{13}\text{C}$  NMR of compound **9a**: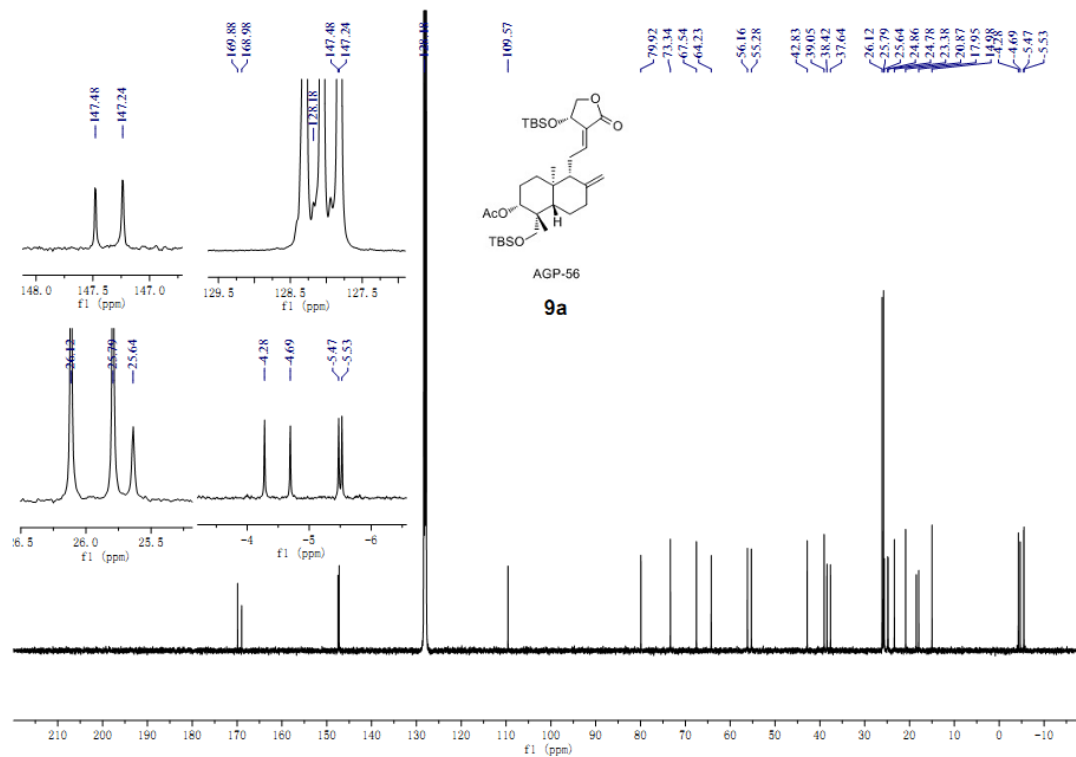

<sup>1</sup>H NMR of compound **9b**: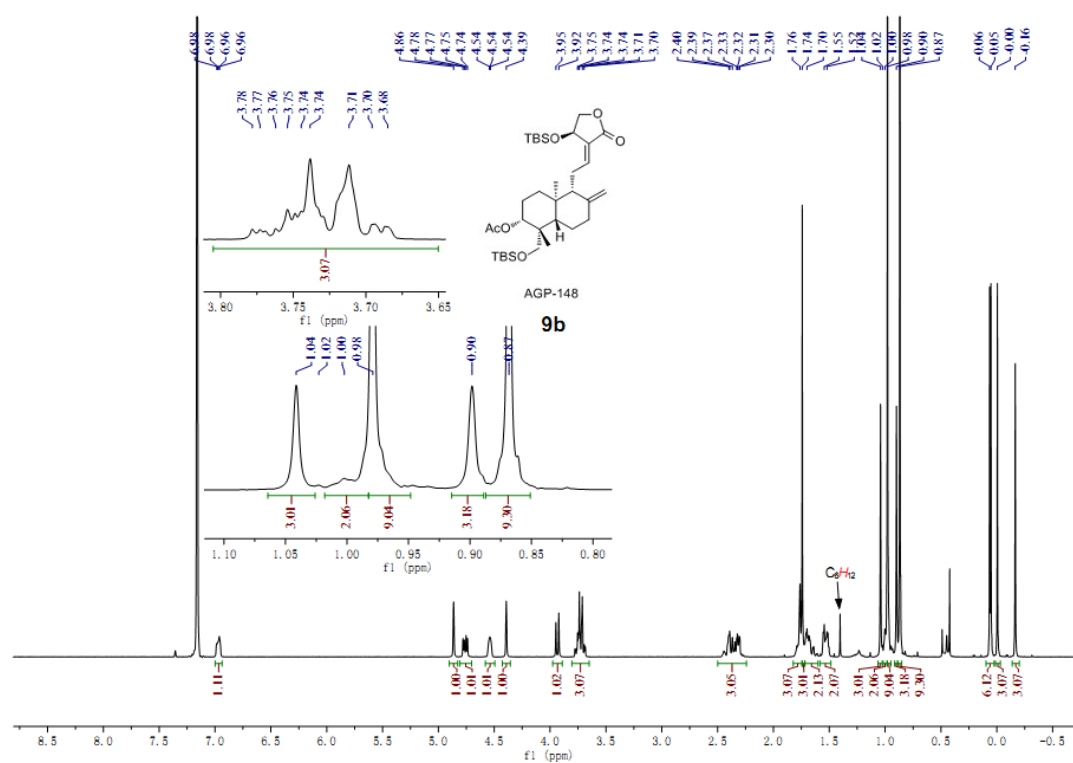

<sup>13</sup>C NMR of compound **9b**:

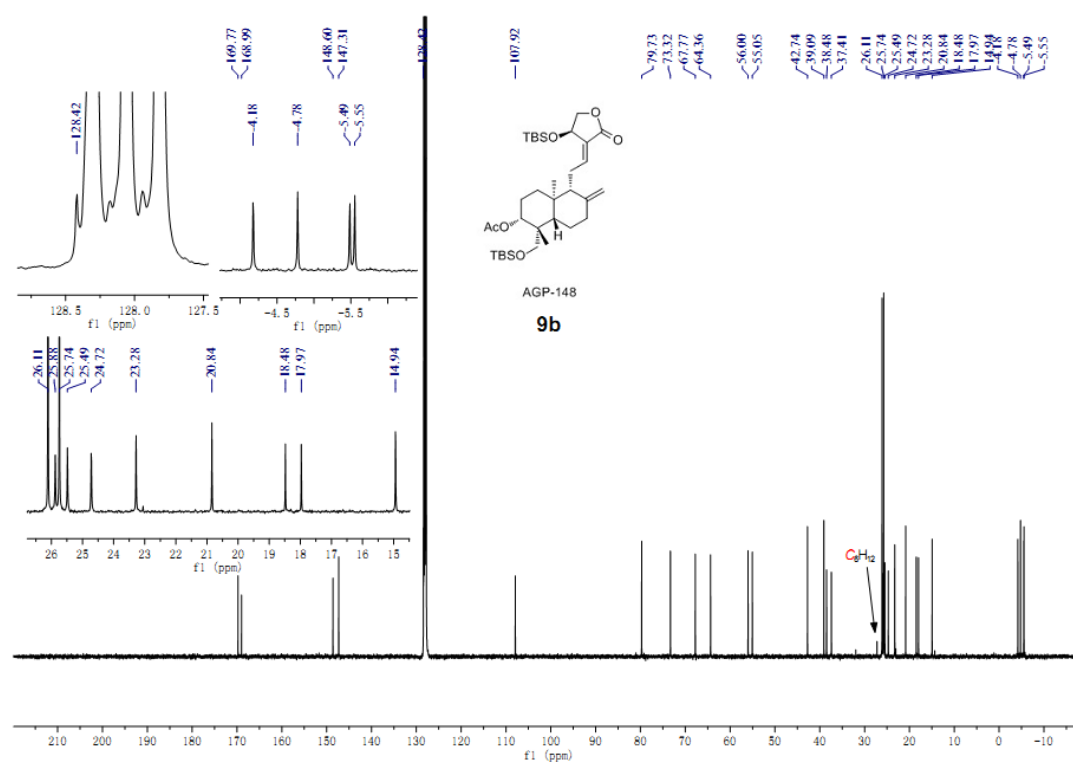

<sup>1</sup>H NMR of compound **10a**:

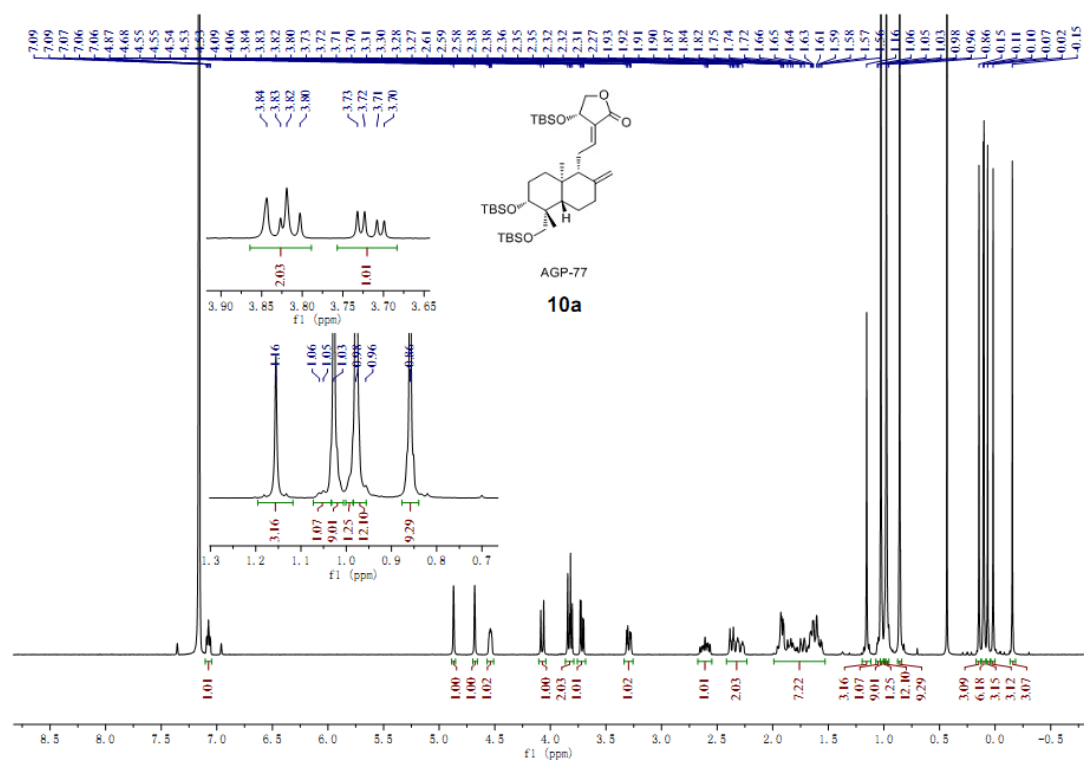 $^{13}\text{C}$  NMR of compound **10a**: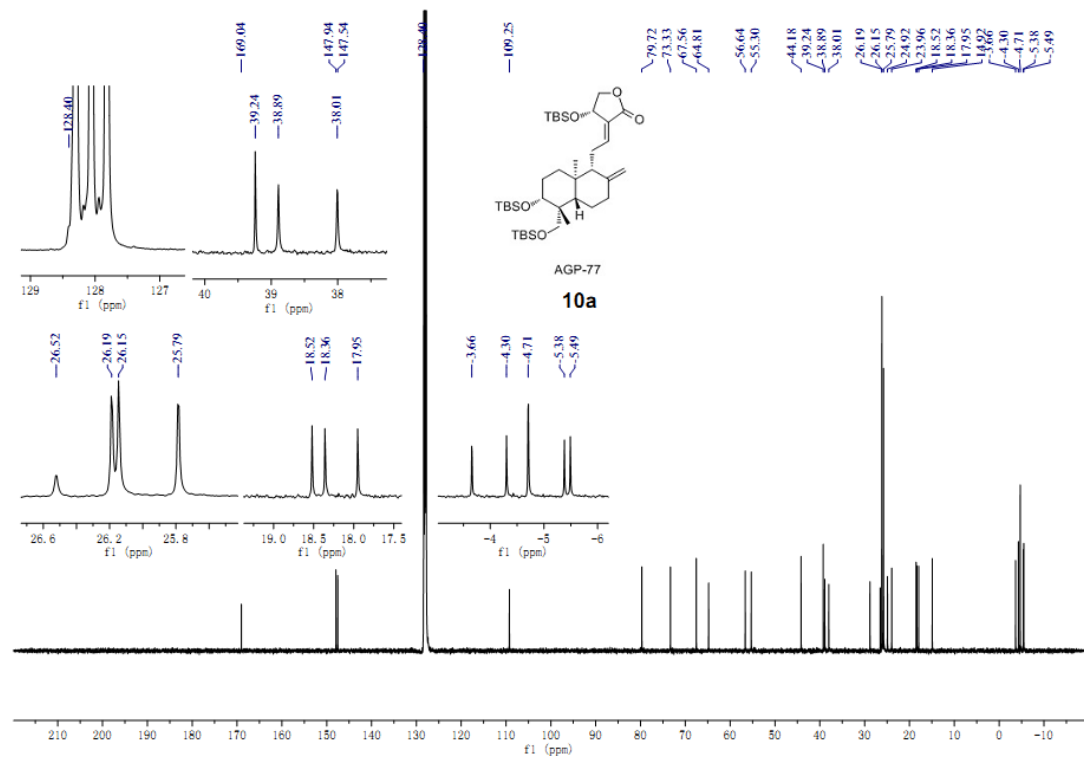

<sup>1</sup>H NMR of compound **10b**:

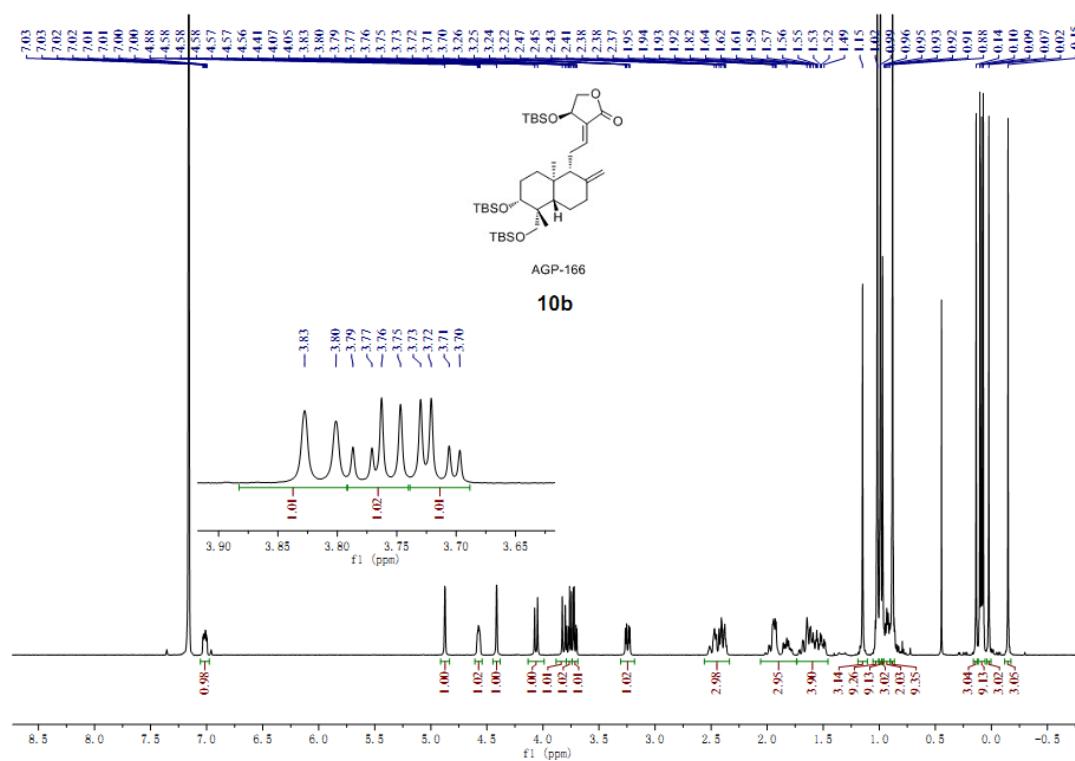 $^{13}\text{C}$  NMR of compound **10b**: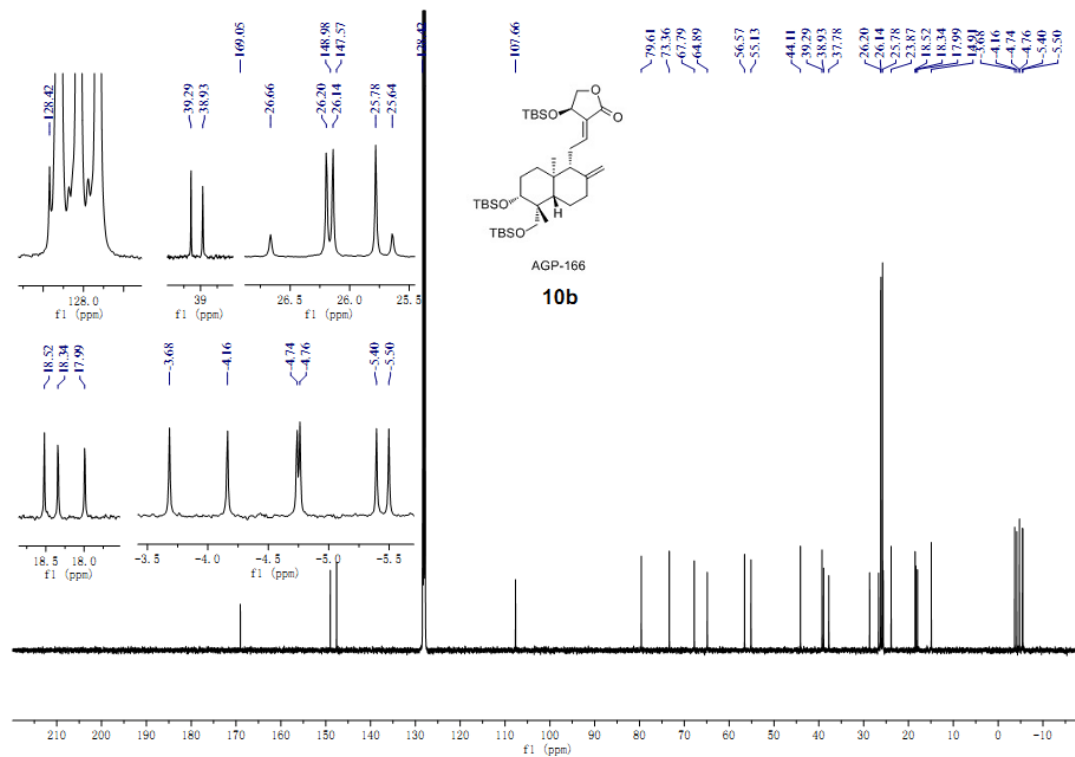

<sup>1</sup>H NMR of compound **11a**:

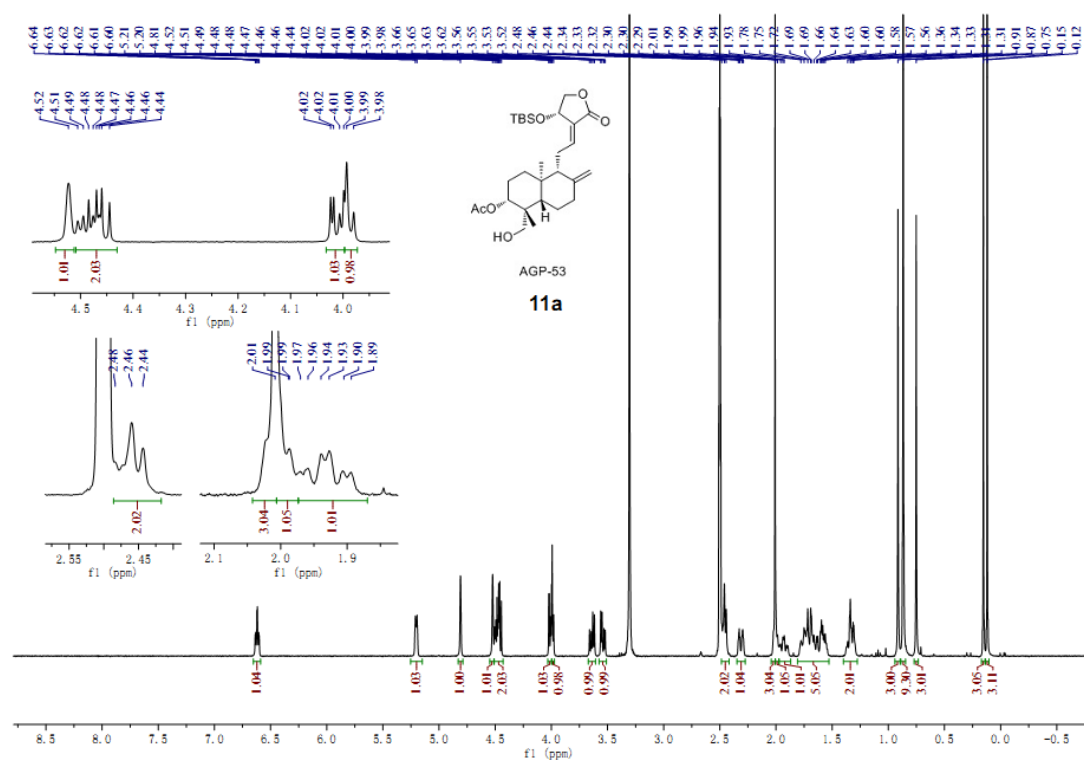 $^{13}\text{C}$  NMR of compound **11a**: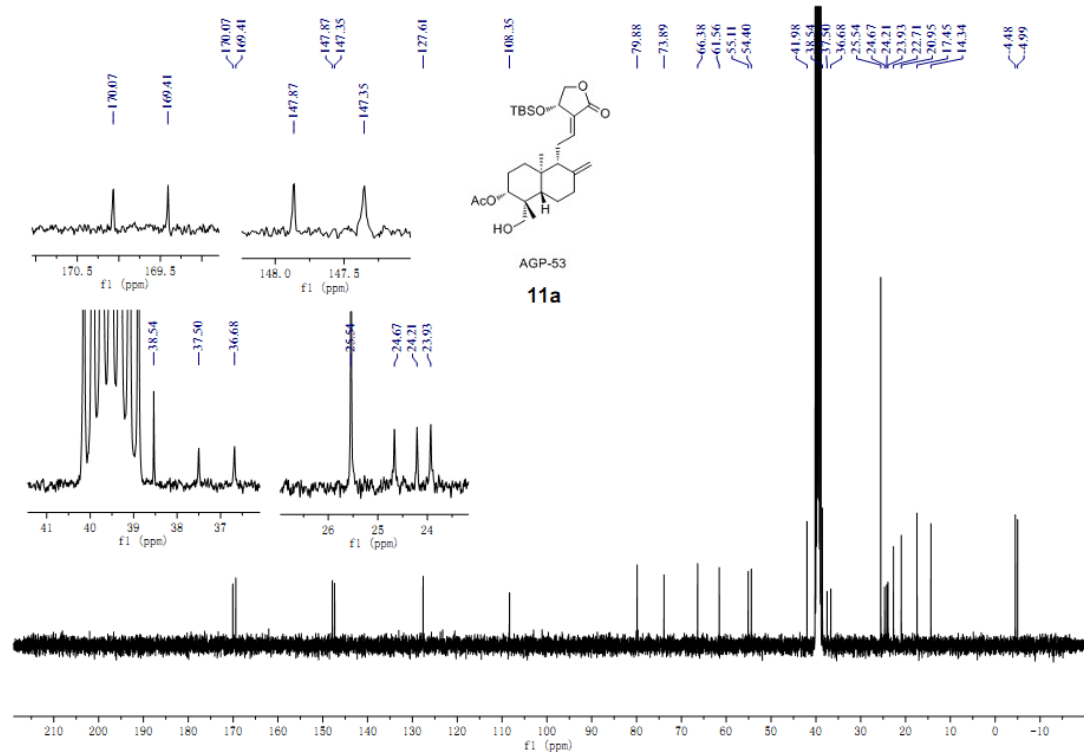



<sup>1</sup>H NMR of compound **11b**:

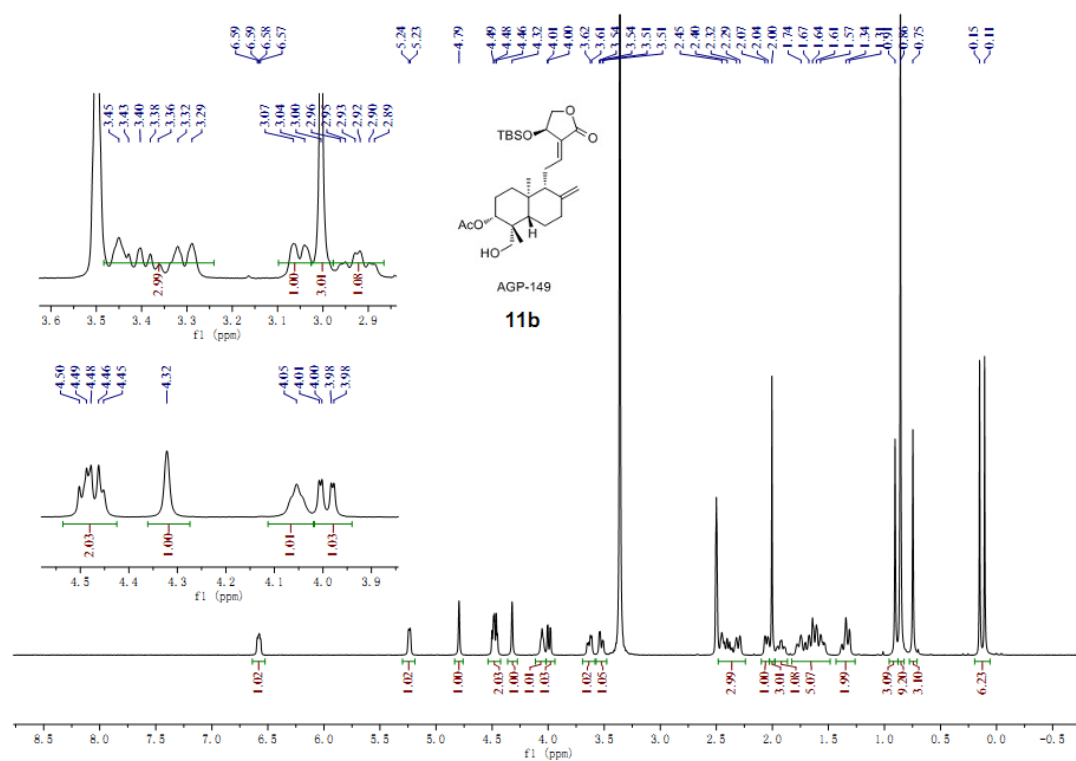

<sup>13</sup>C NMR of compound **11b**:

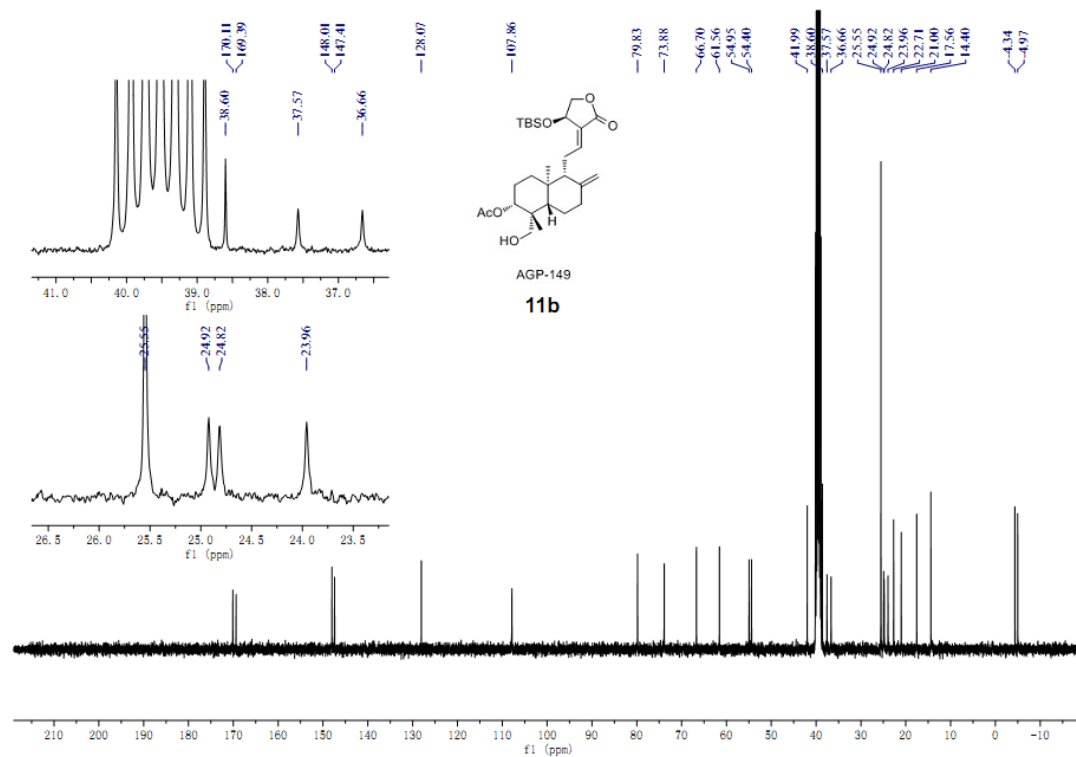

<sup>1</sup>H NMR of compound **12a**:

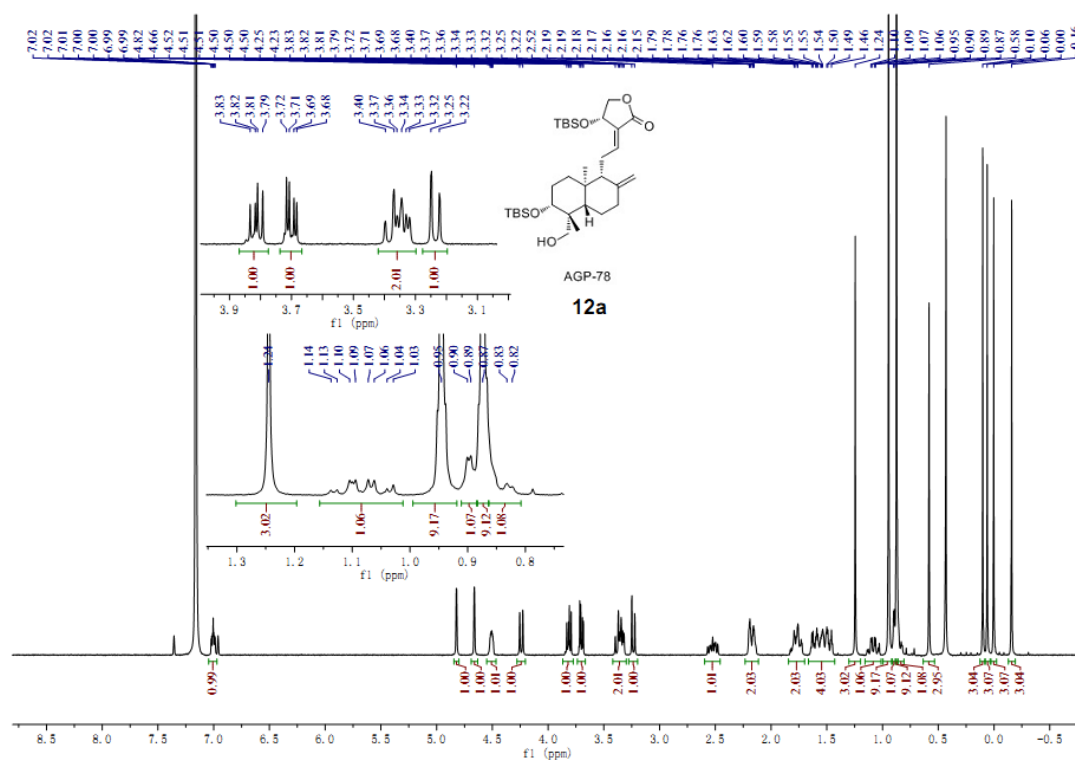

<sup>13</sup>C NMR of compound **12a**:

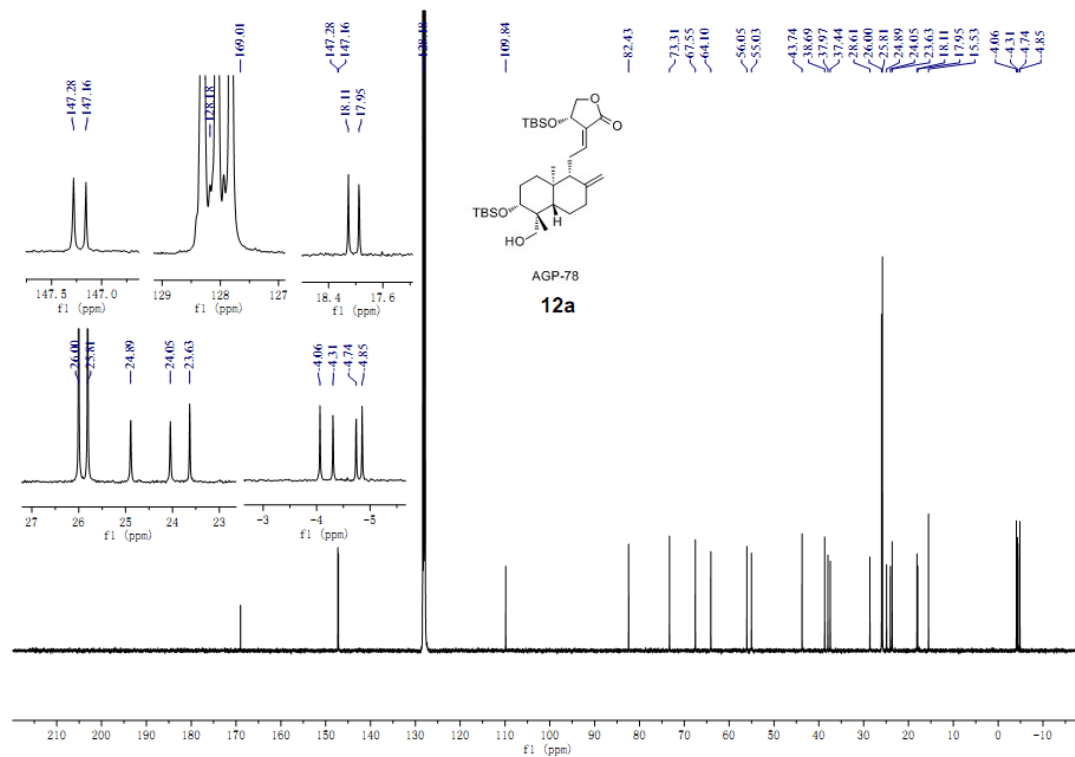

<sup>1</sup>H NMR of compound **12b**:

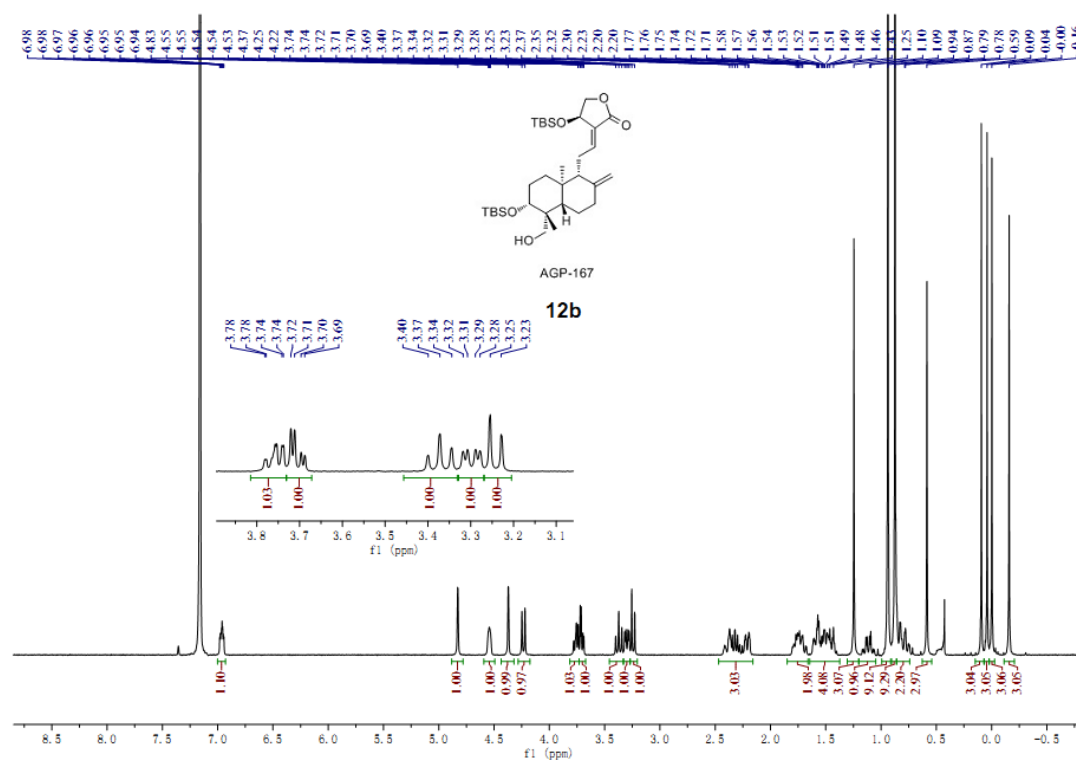

<sup>13</sup>C NMR of compound **12b**:

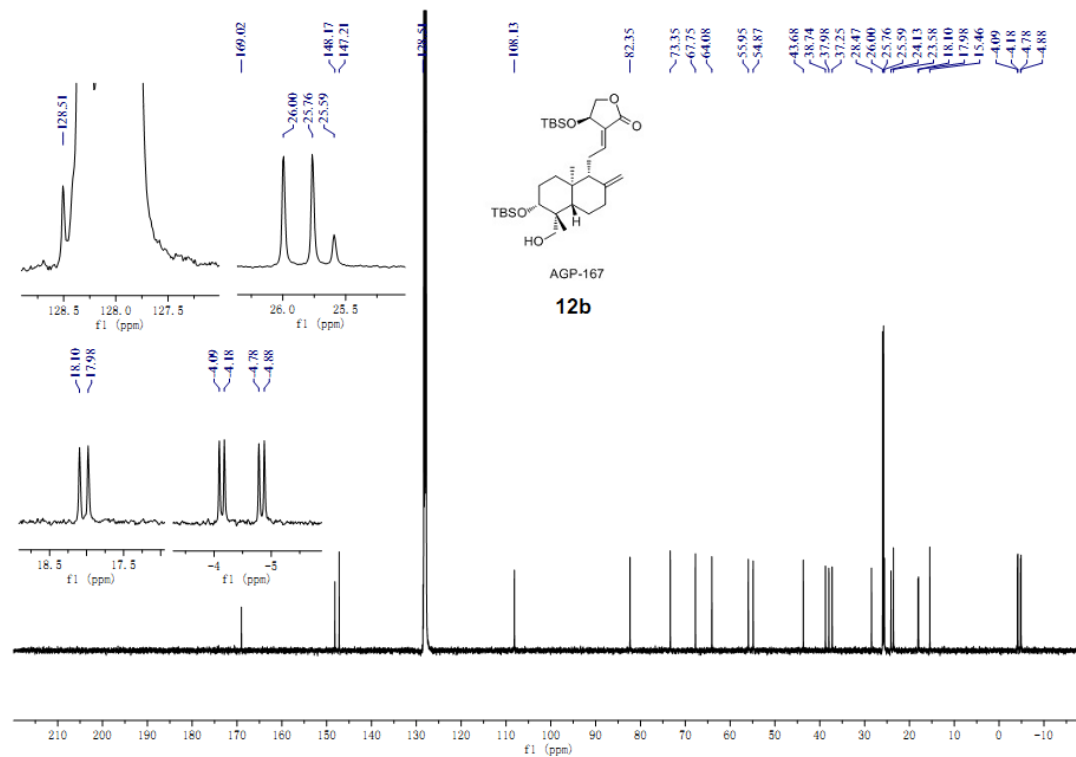

<sup>1</sup>H NMR of compound **13a**:

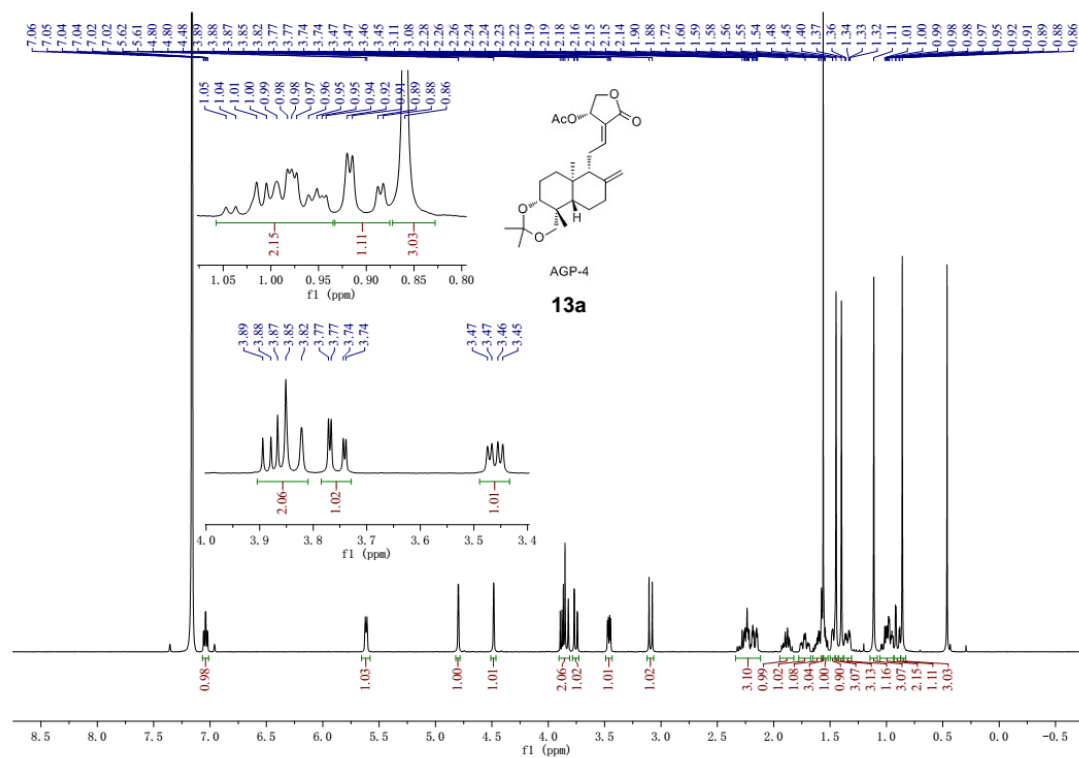

<sup>1</sup>H NMR of compound **13a**:

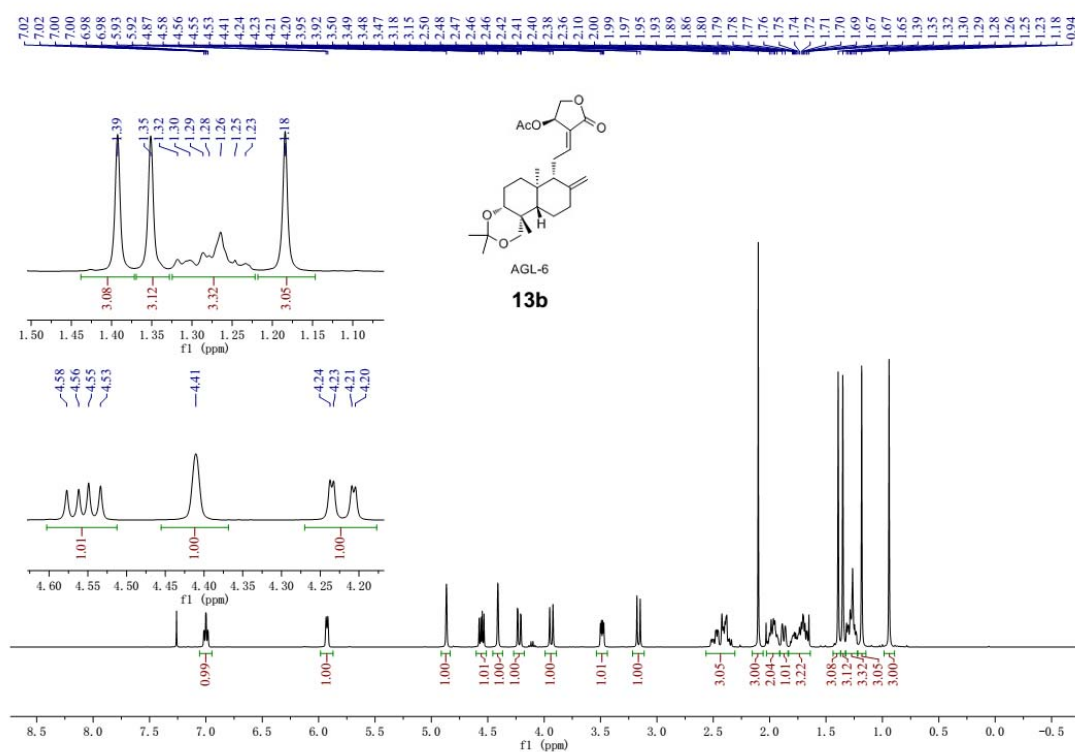

$^1\text{H}$  NMR of compound **14a**:

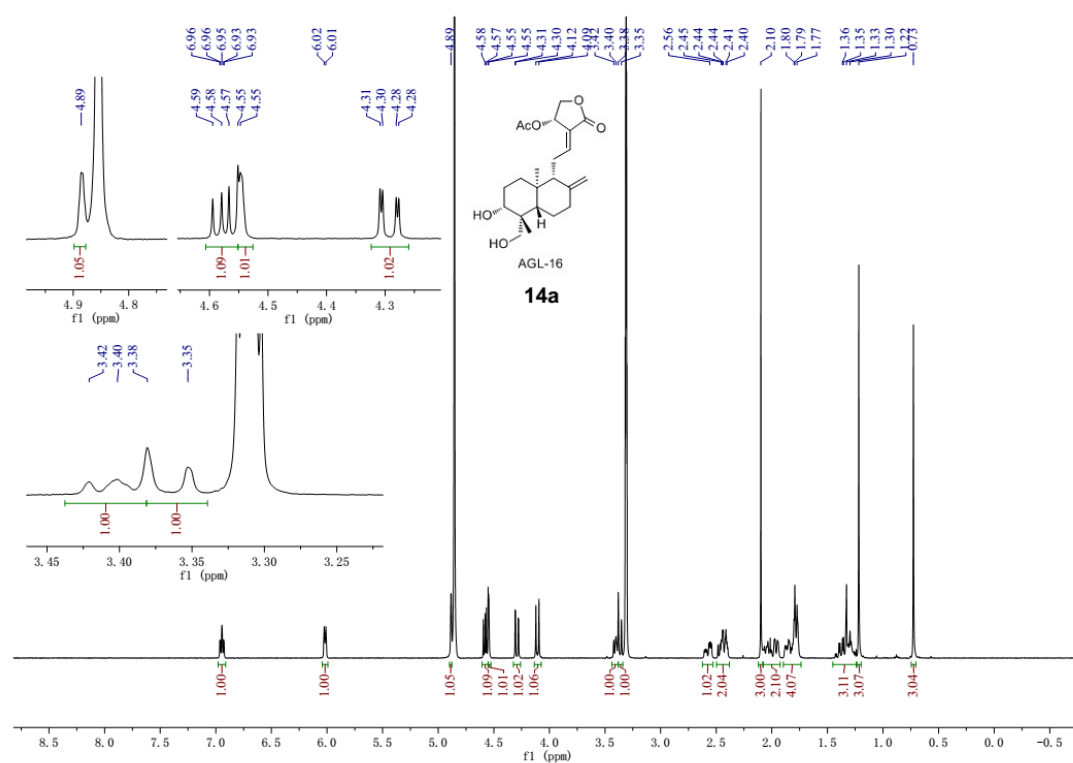

<sup>1</sup>H NMR of compound **14b**:

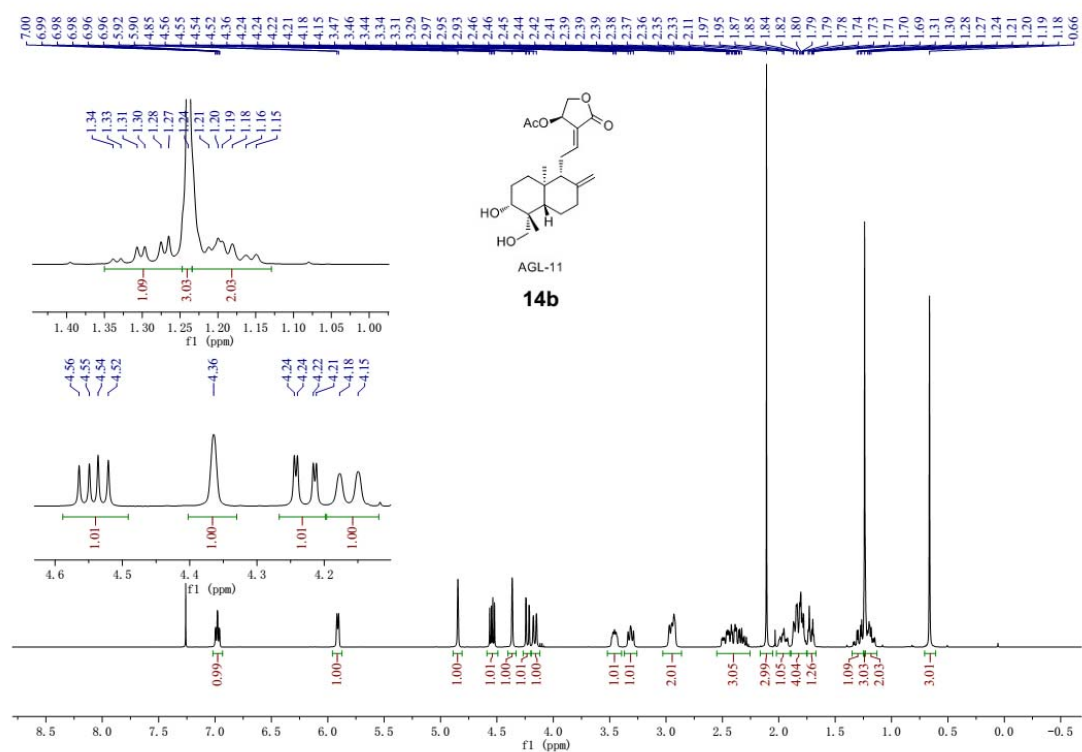

<sup>1</sup>H NMR of compound **15a**:

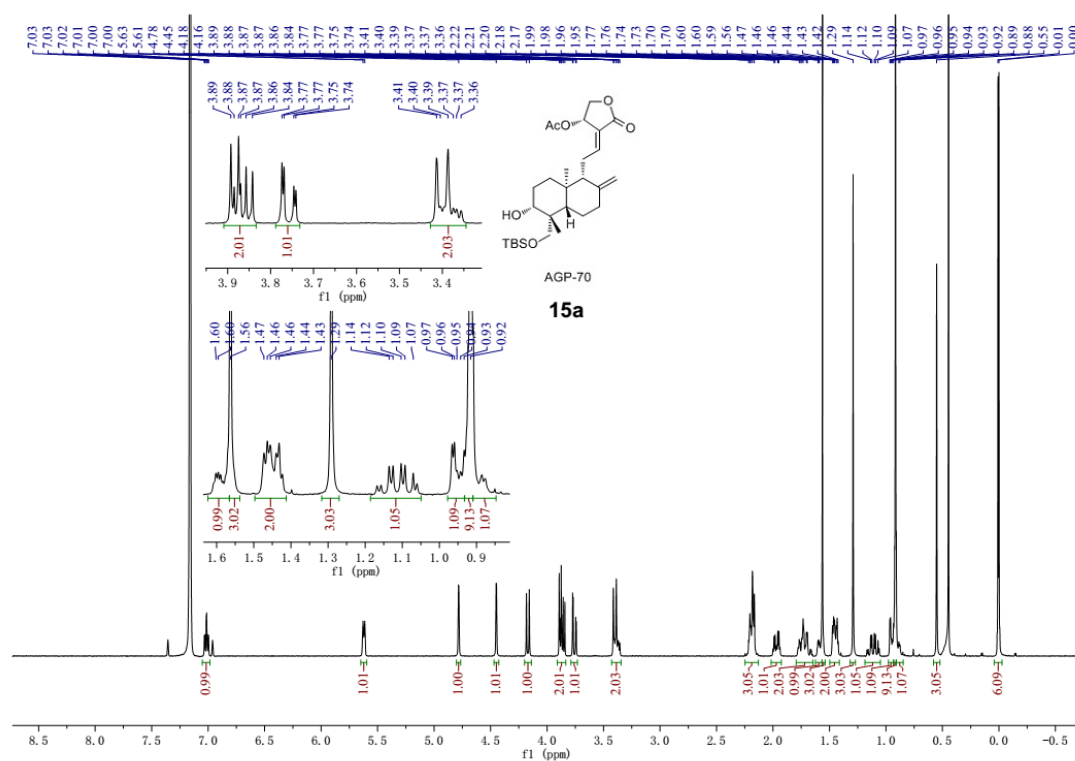



<sup>1</sup>H NMR of compound **15b**:

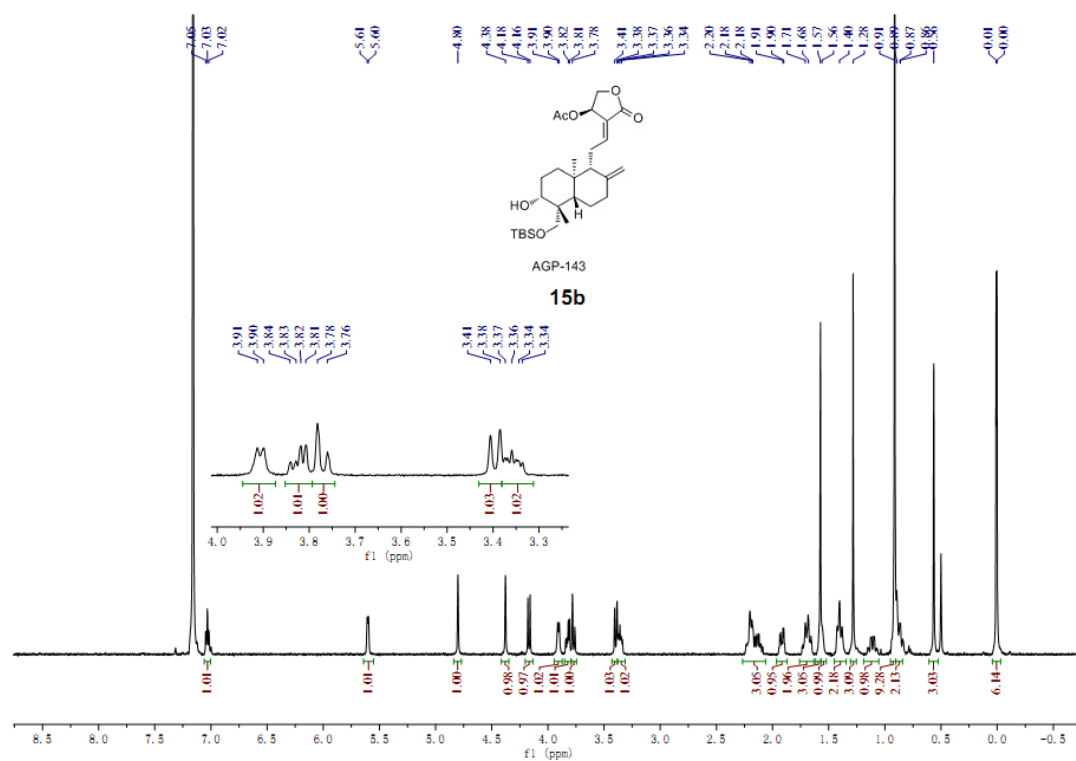

<sup>13</sup>C NMR of compound **15b**:

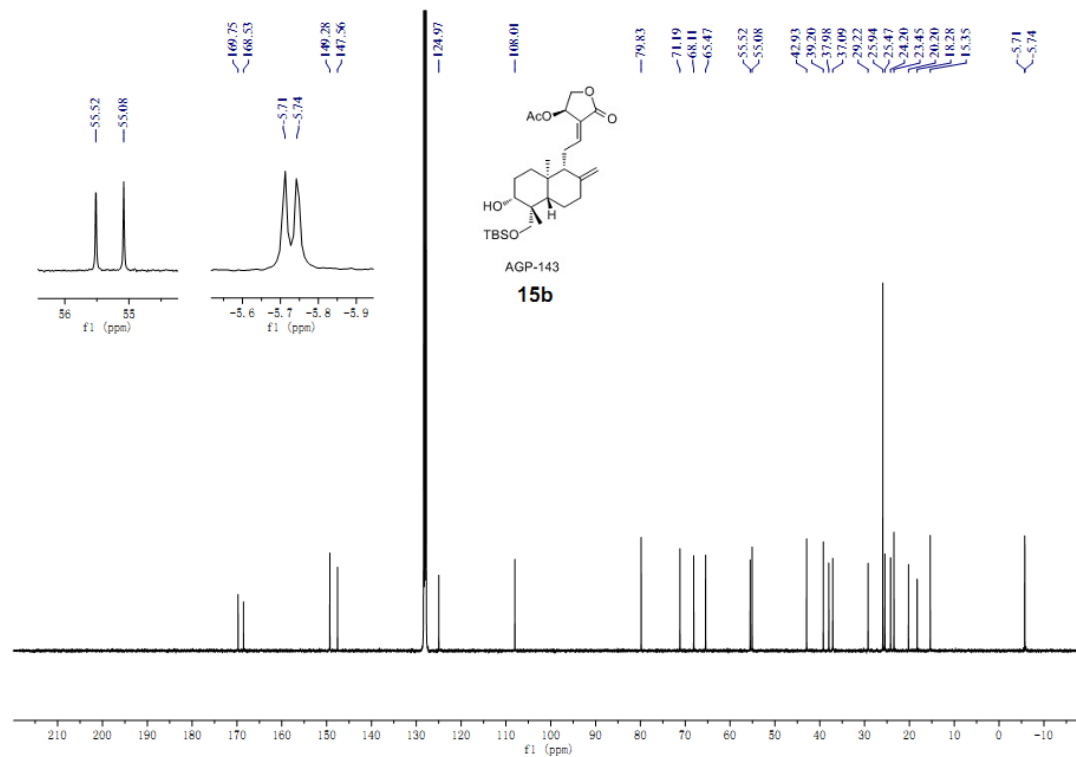

<sup>1</sup>H NMR of compound **16a**:

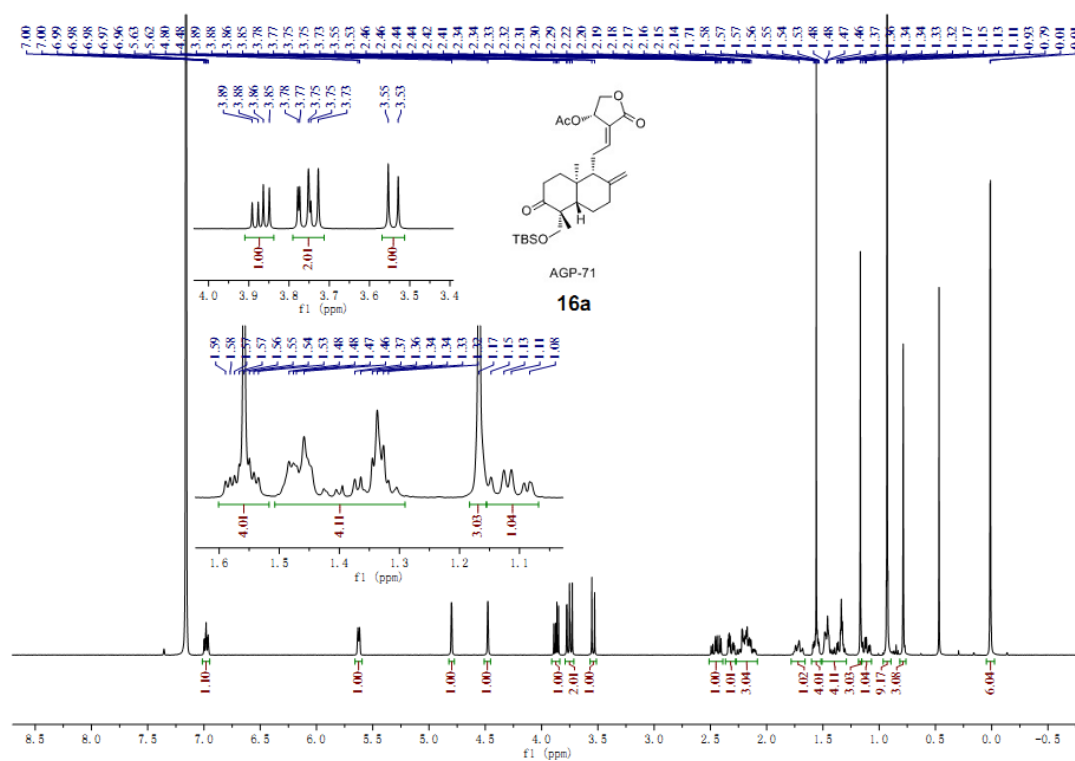

<sup>1</sup>H NMR of compound **16b**:

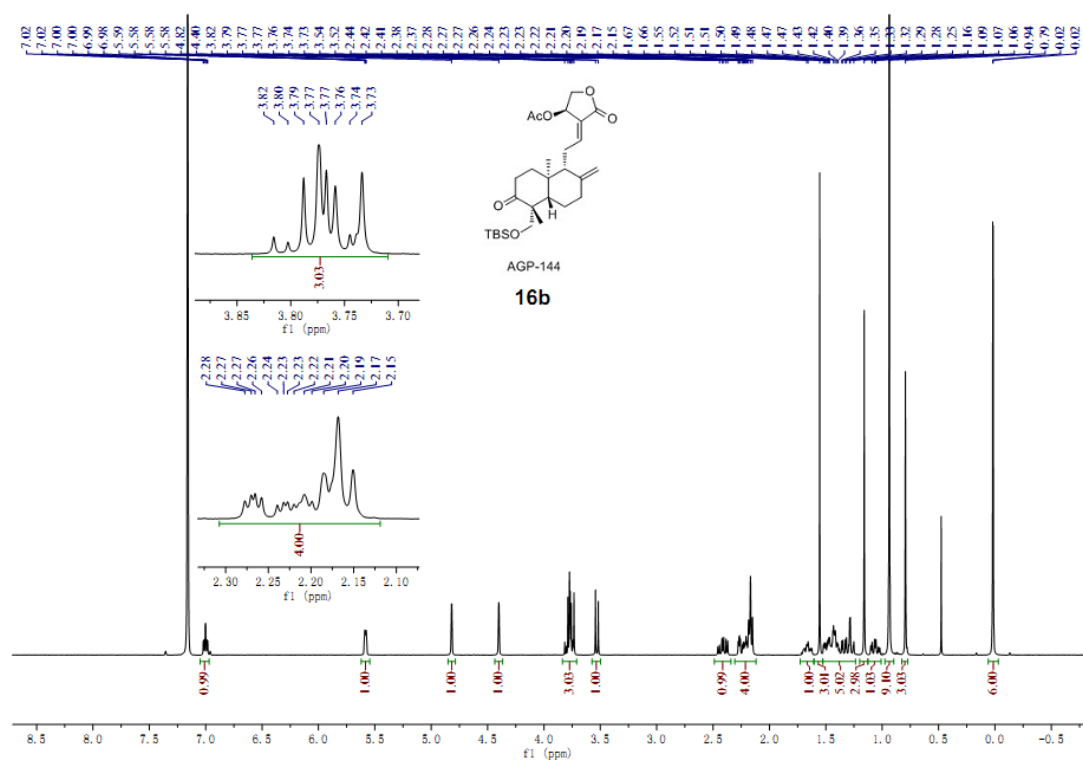

<sup>13</sup>C NMR of compound **16b**:

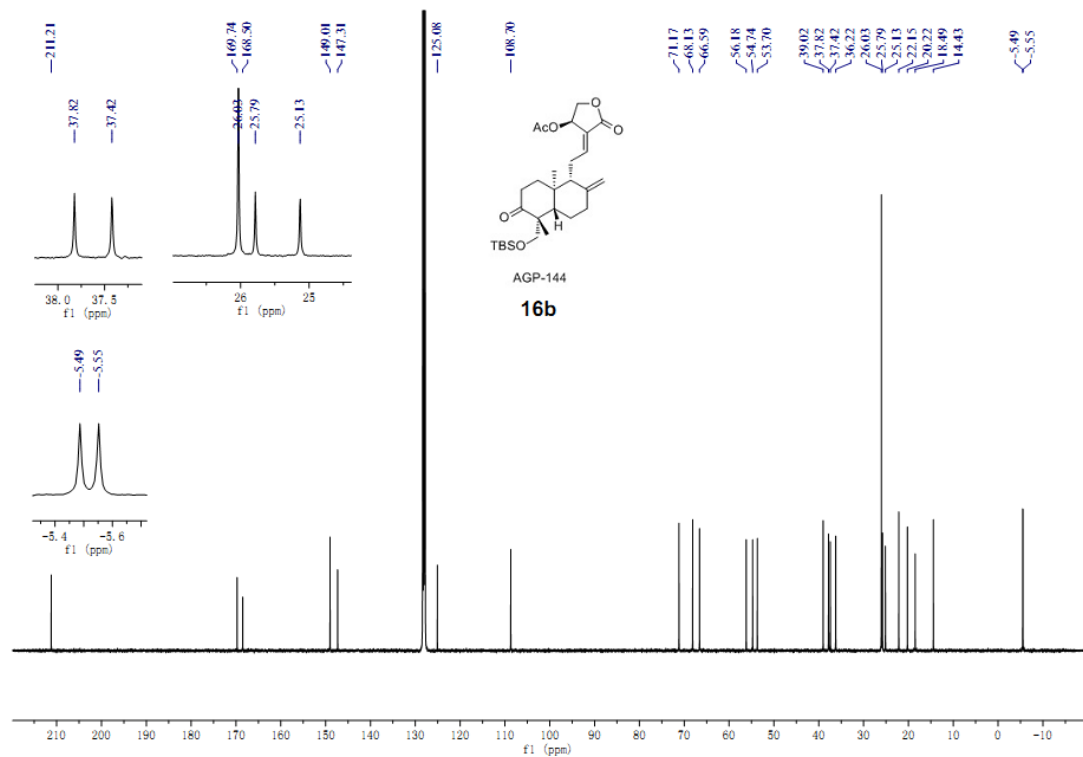

<sup>1</sup>H NMR of compound **17a**:

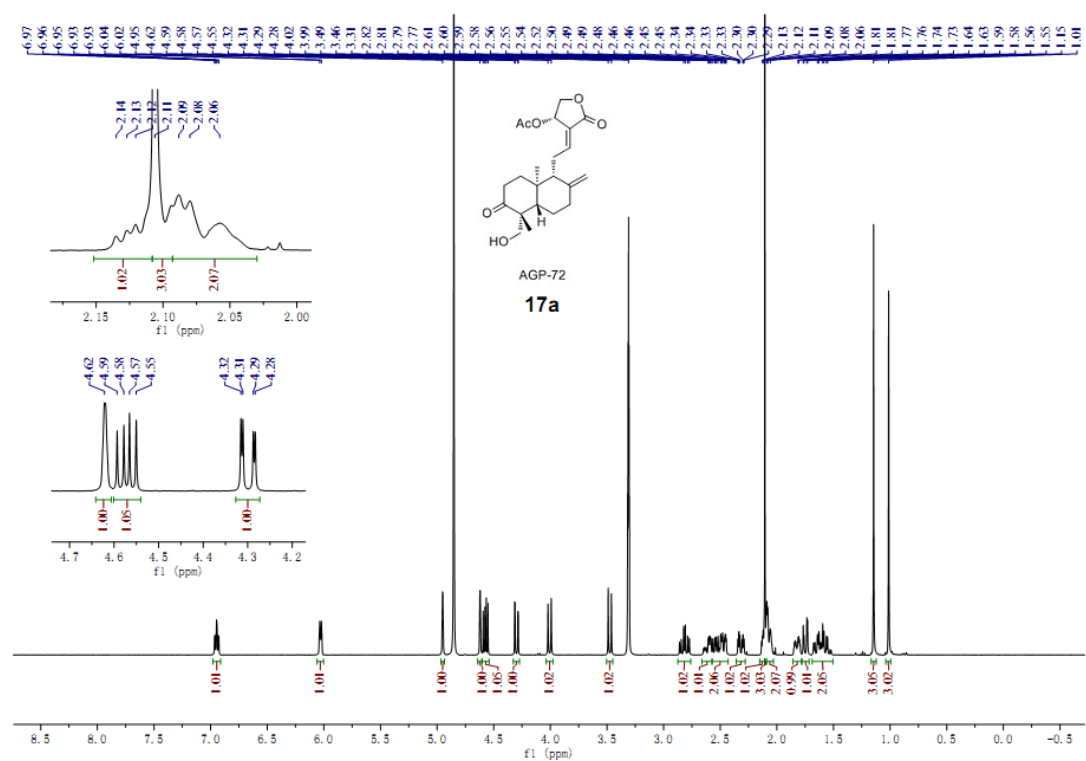

<sup>13</sup>C NMR of compound **17a**:

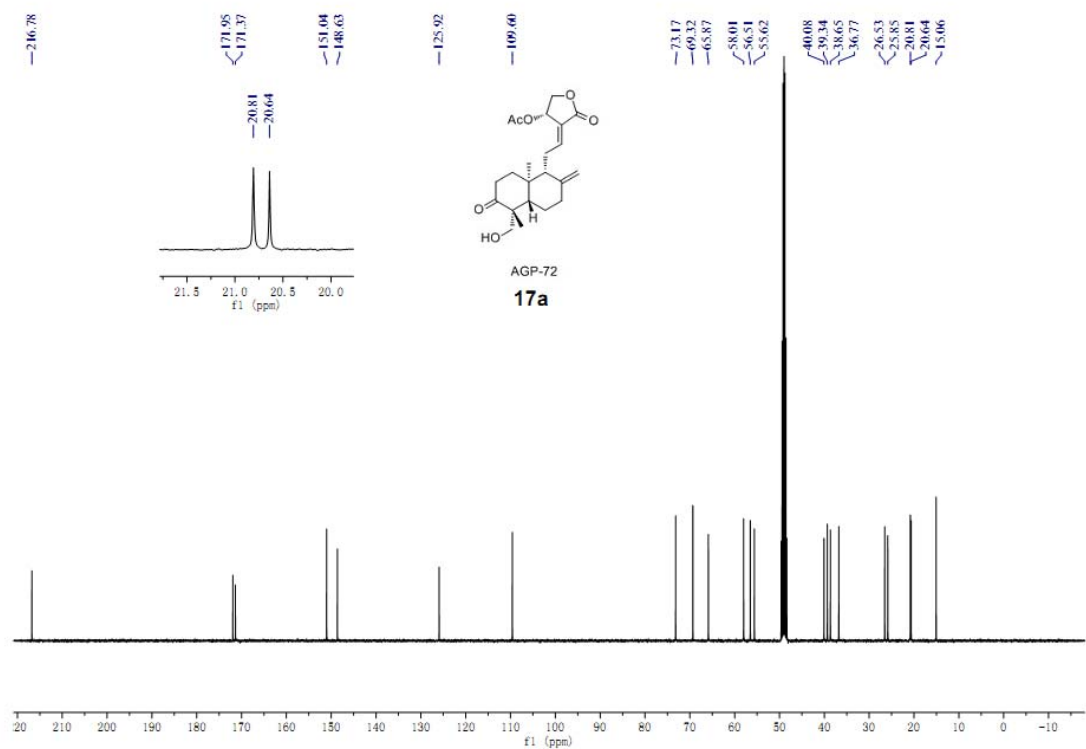

<sup>1</sup>H NMR of compound **17b**:

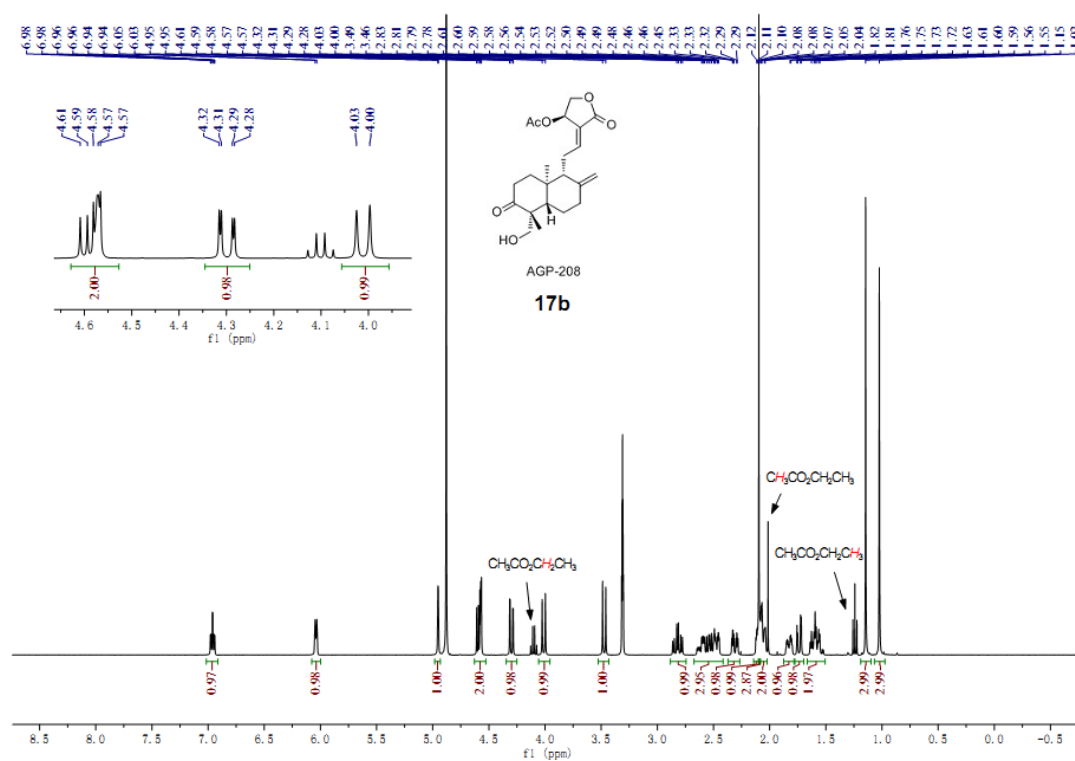

<sup>13</sup>C NMR of compound **17b**:

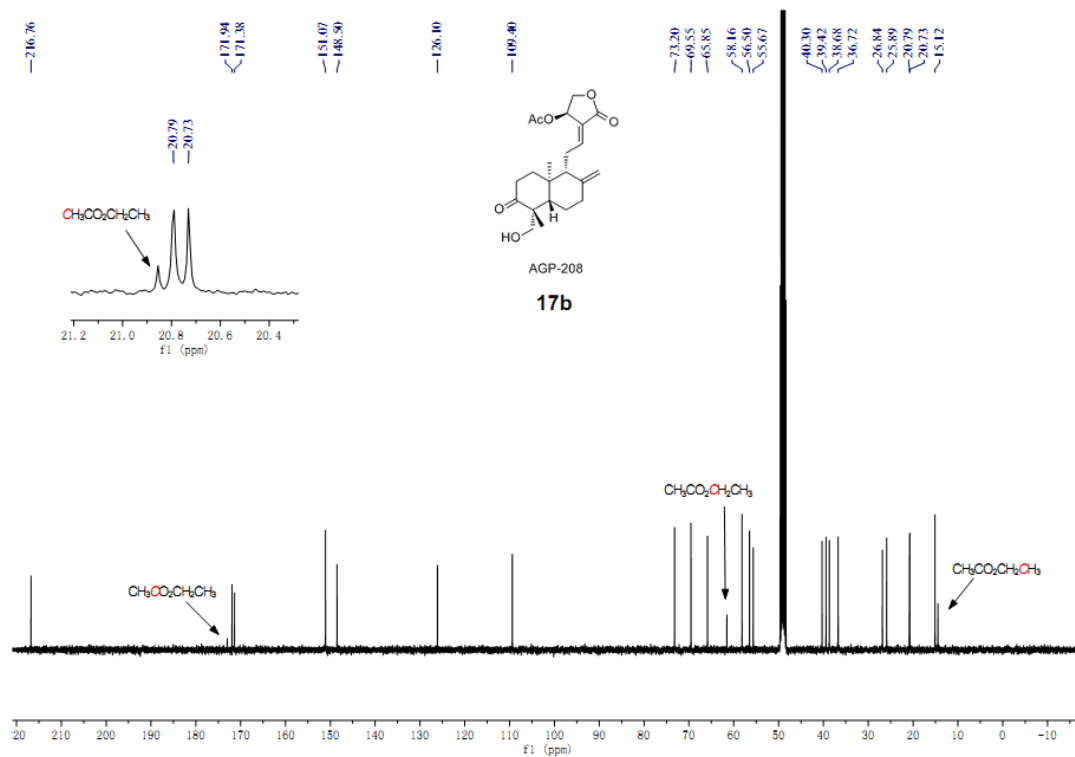

<sup>1</sup>H NMR of compound **18a**:

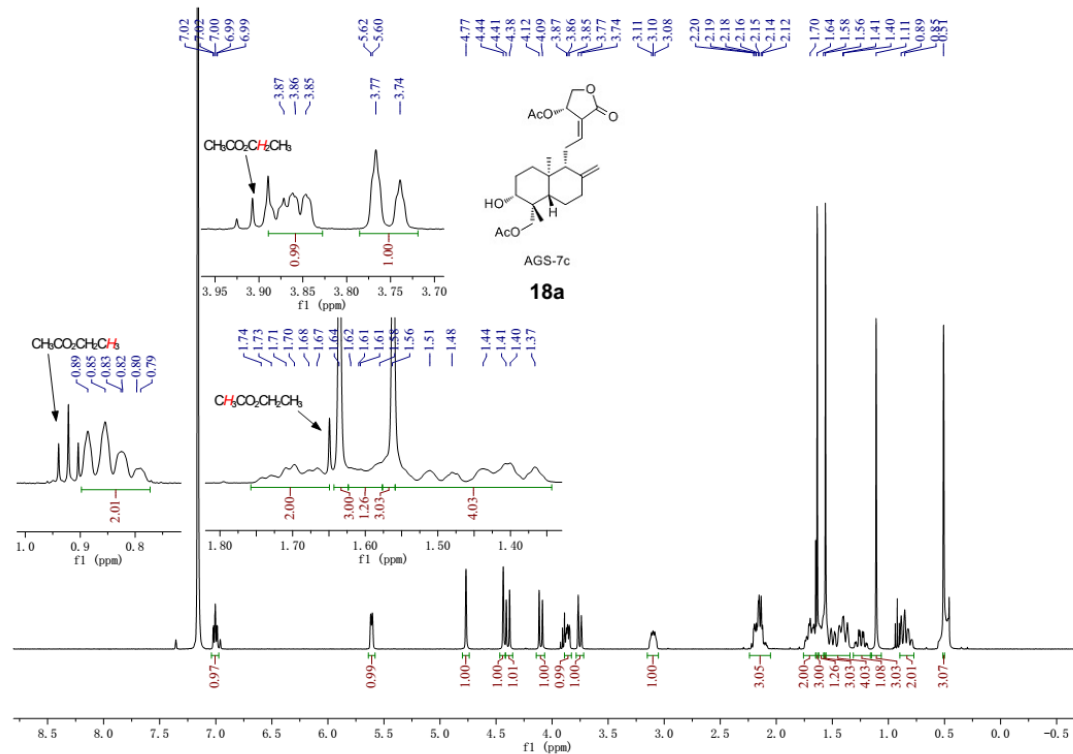

<sup>1</sup>H NMR of compound **18b**:

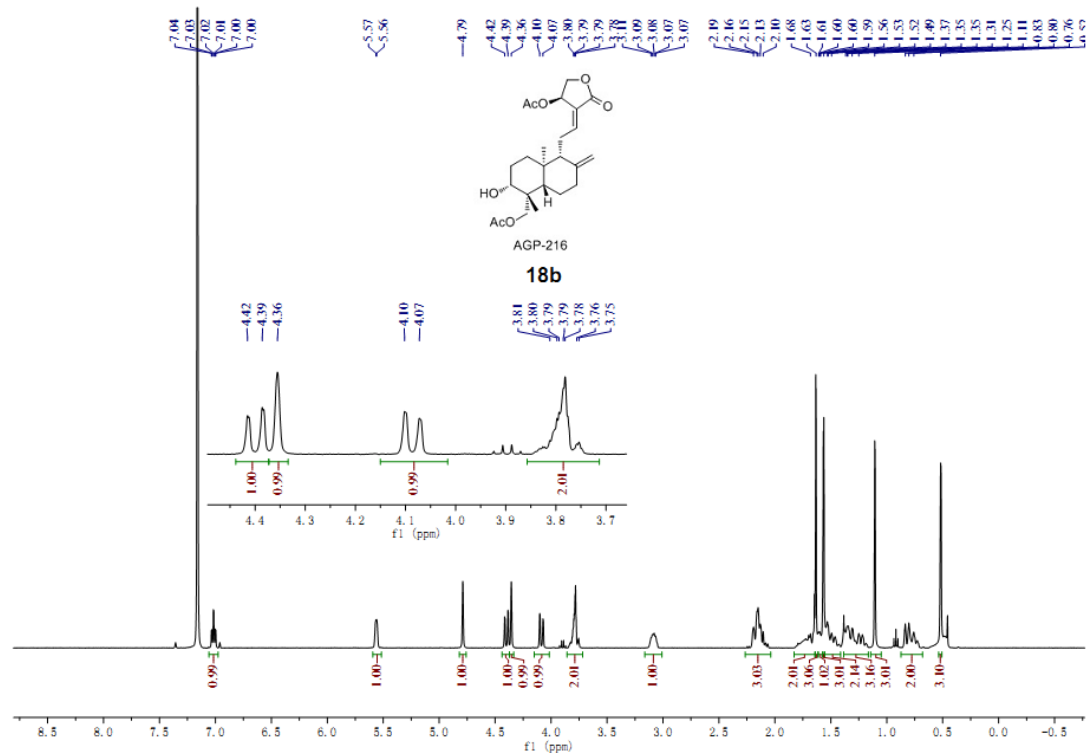

<sup>13</sup>C NMR of compound **18b**:

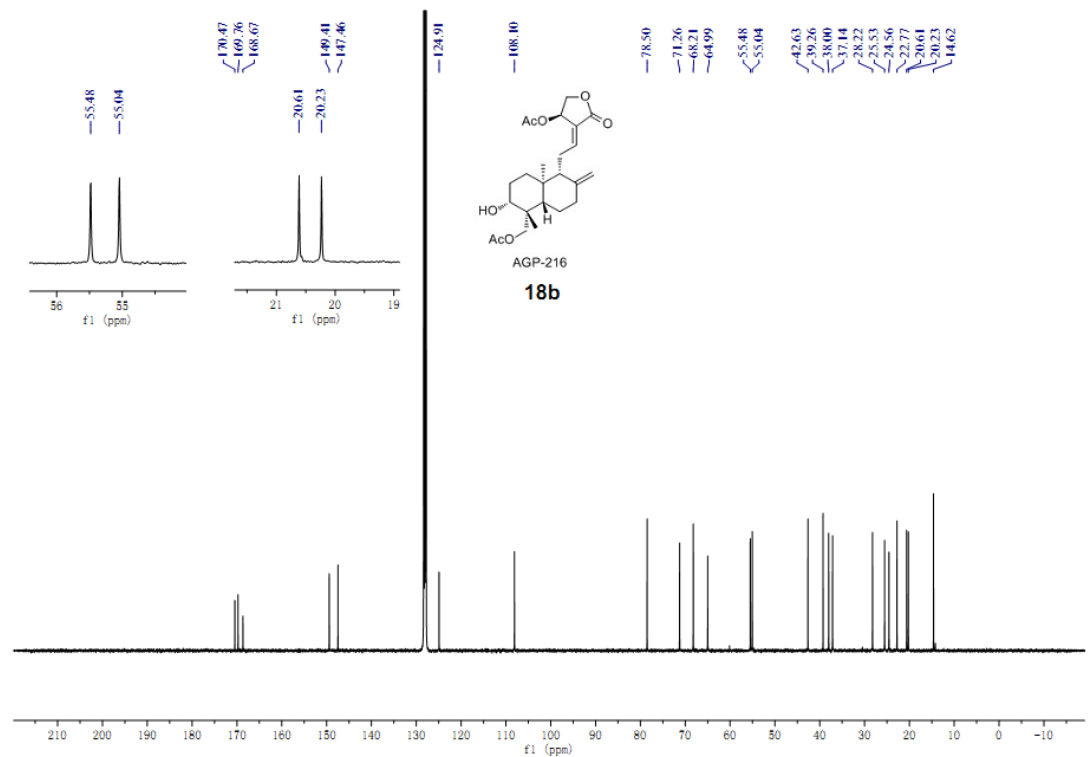

<sup>1</sup>H NMR of compound **19a**:

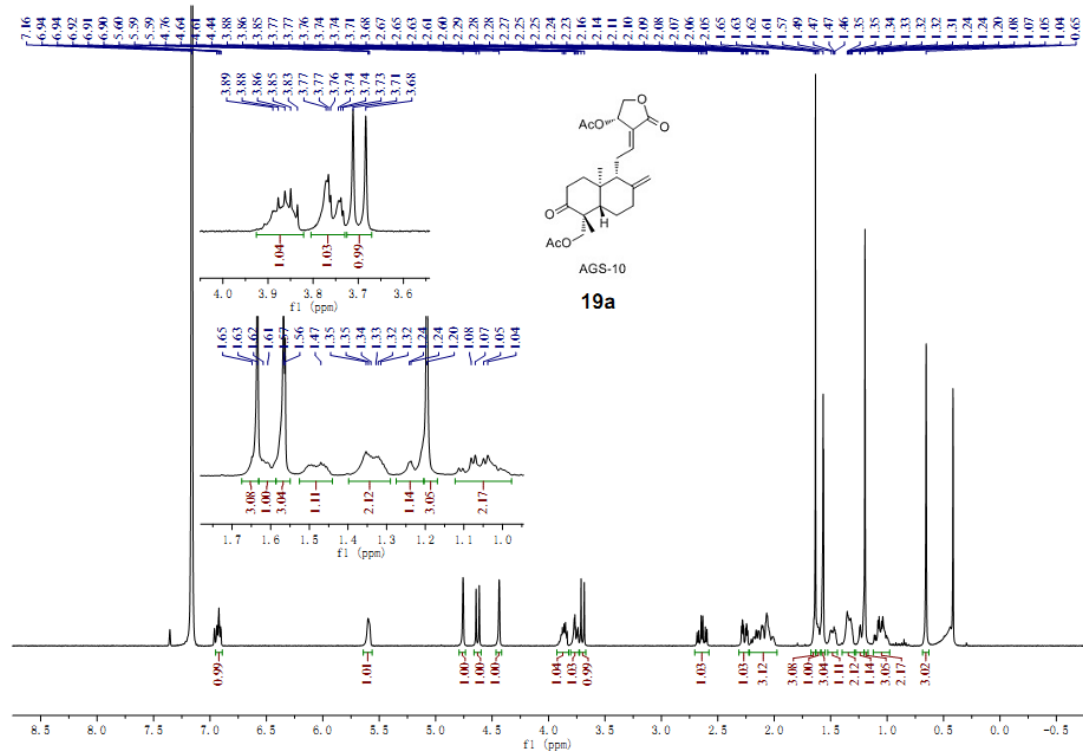

<sup>13</sup>C NMR of compound **19a**:

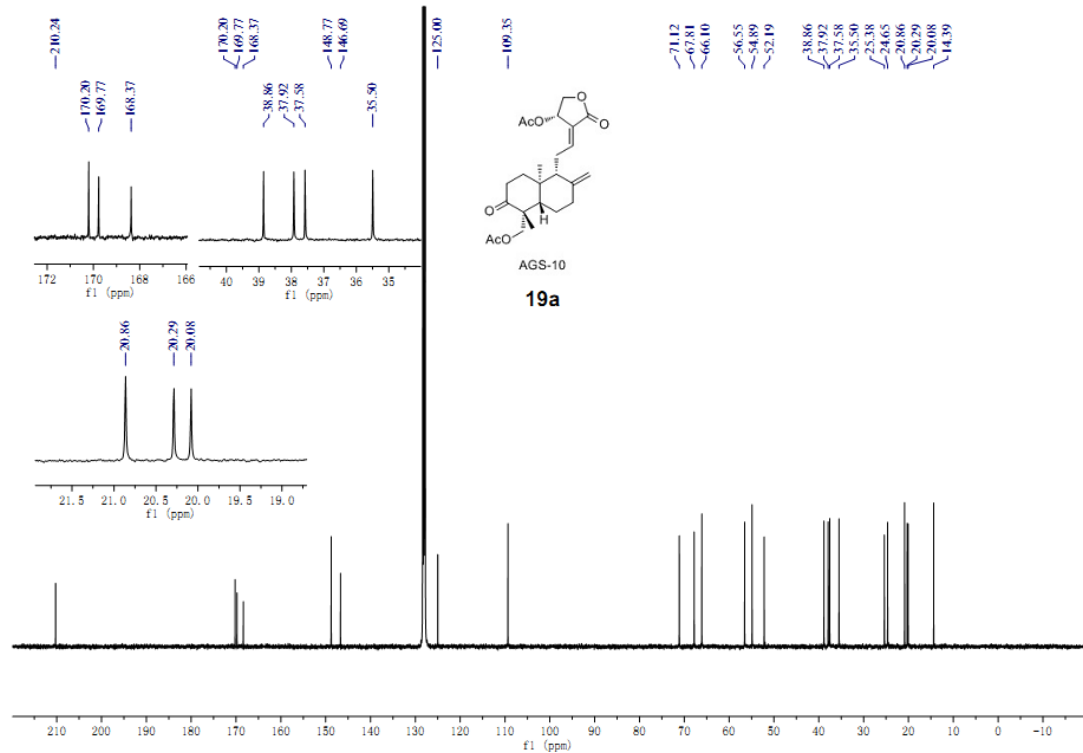



<sup>1</sup>H NMR of compound **19b**:

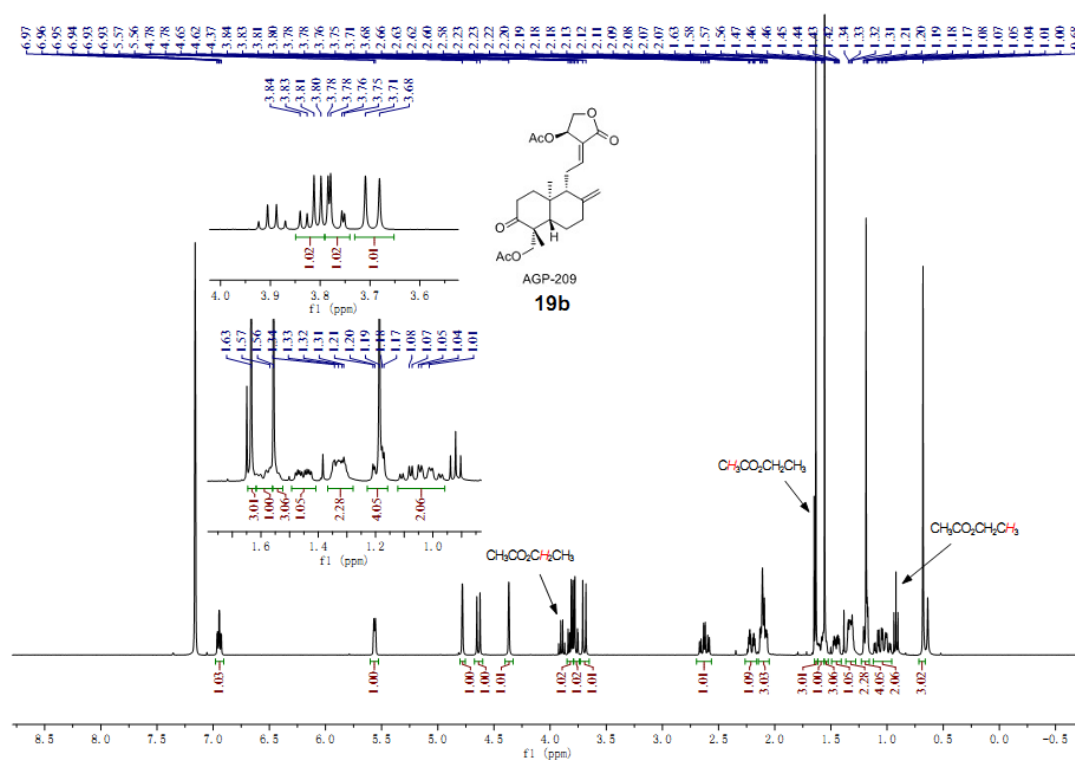

<sup>13</sup>C NMR of compound **19b**:

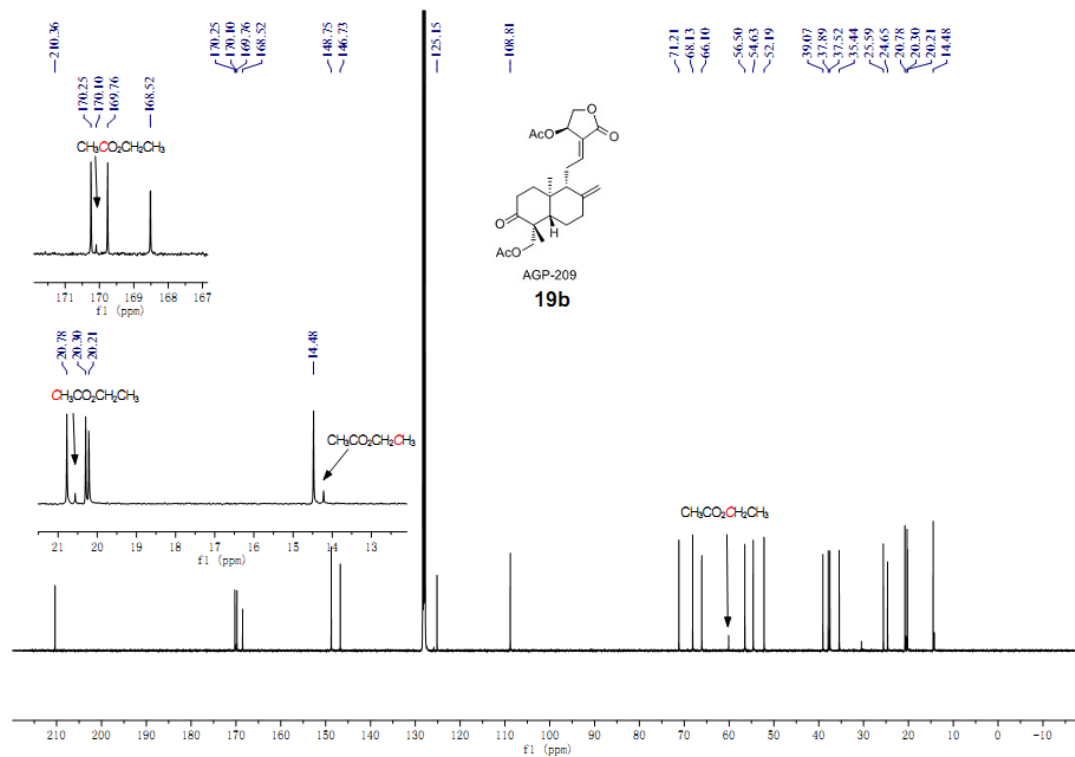

<sup>1</sup>H NMR of compound **20a**:

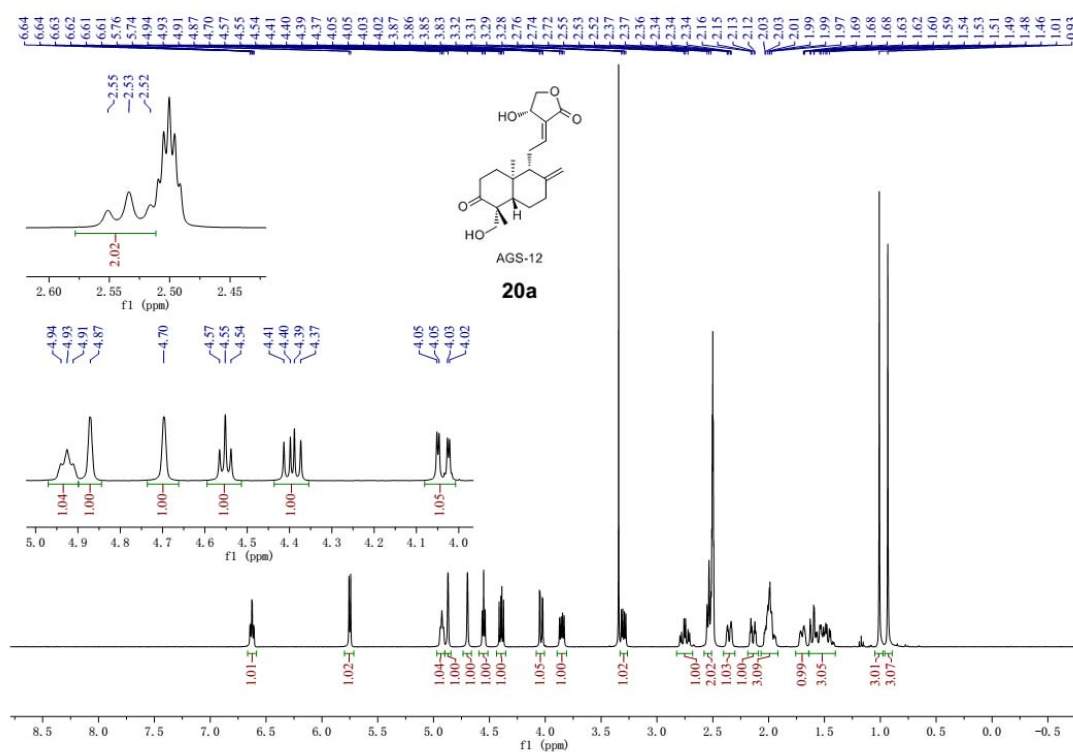

<sup>1</sup>H NMR of compound **20b**:

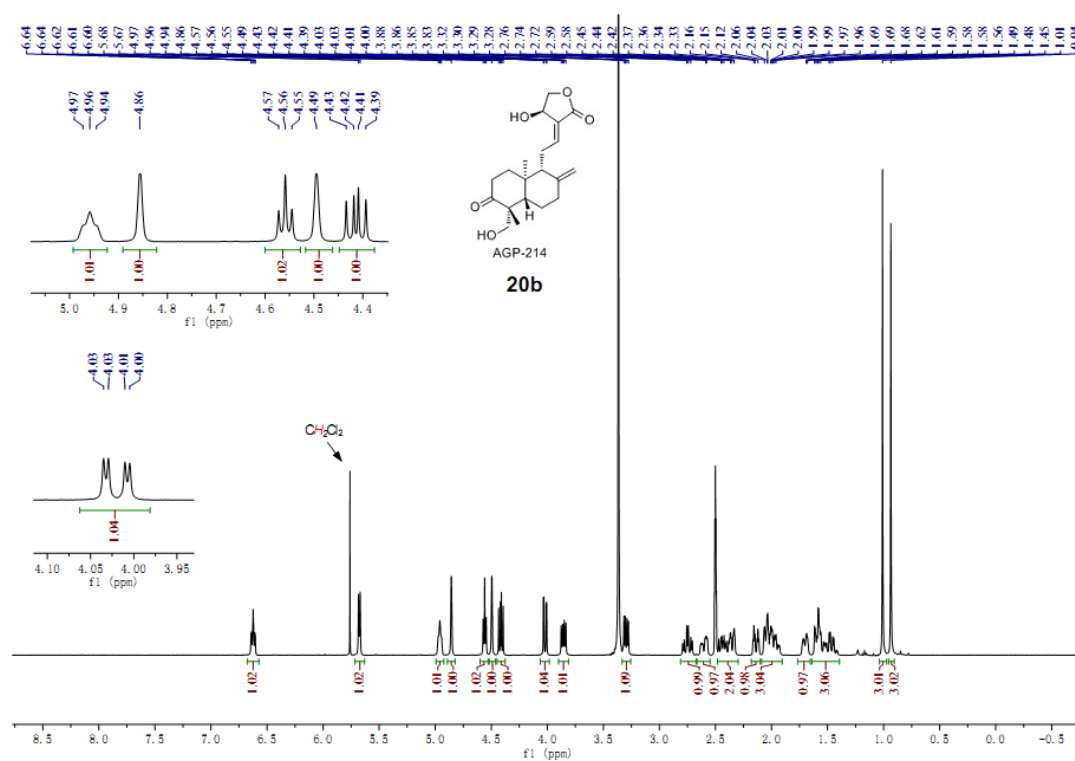

<sup>13</sup>C NMR of compound **20b**:

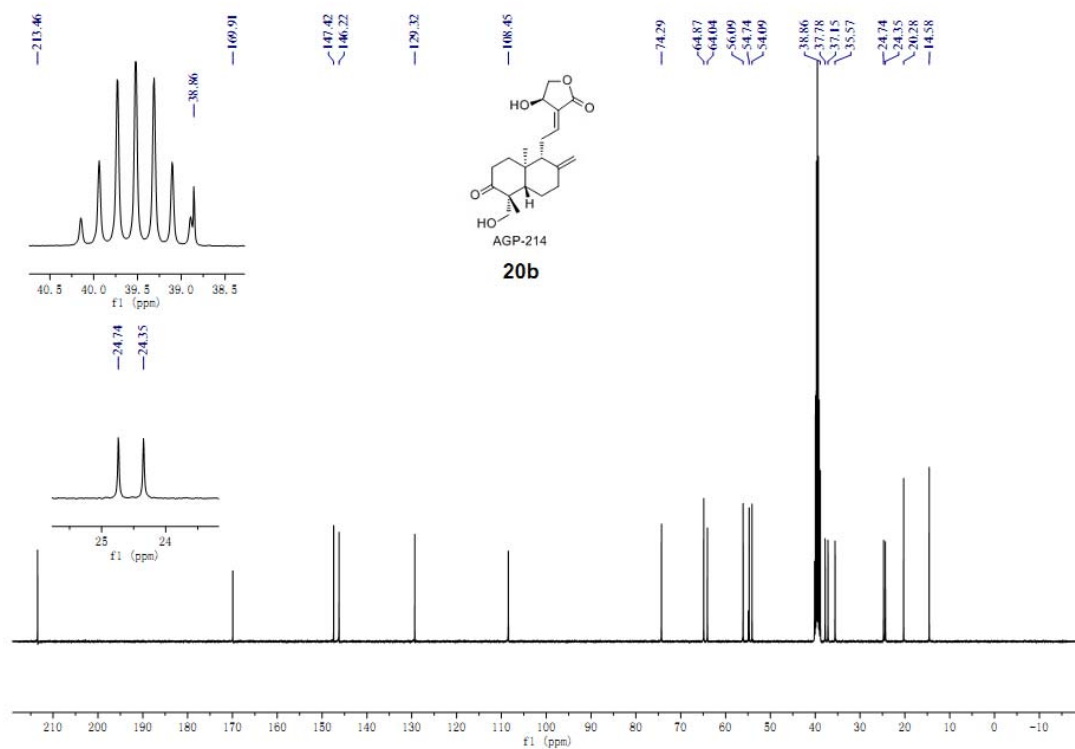

<sup>1</sup>H NMR of compound **21a**:

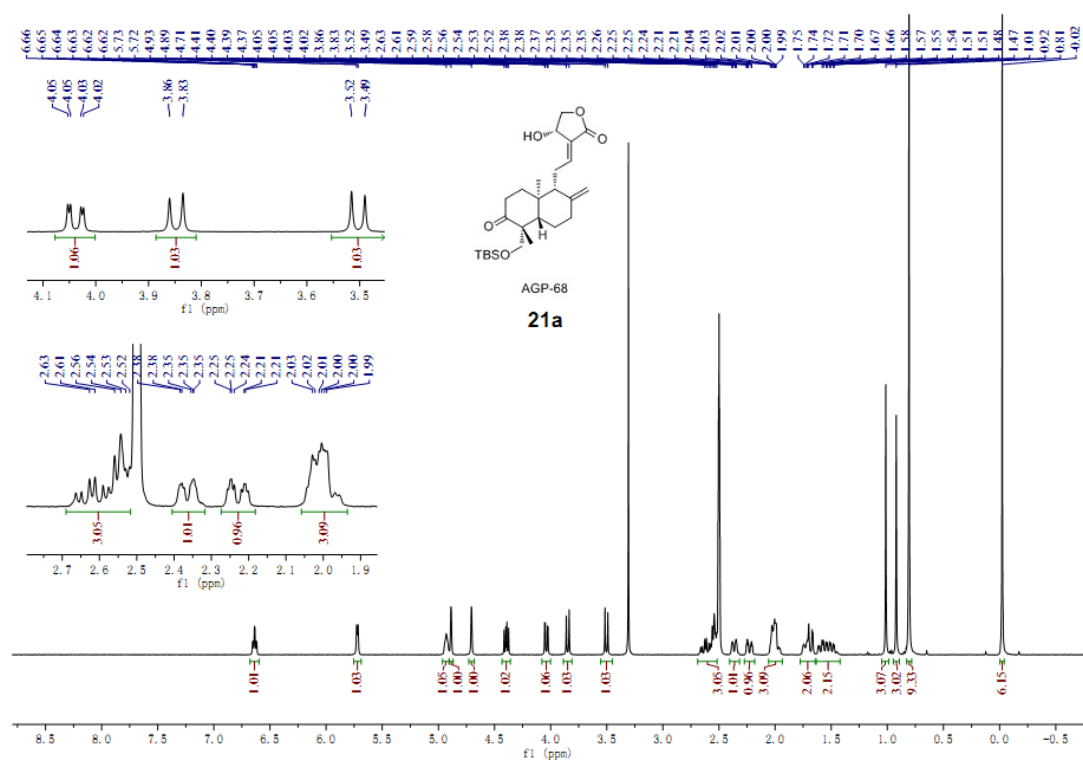 $^{13}\text{C}$  NMR of compound **21a**: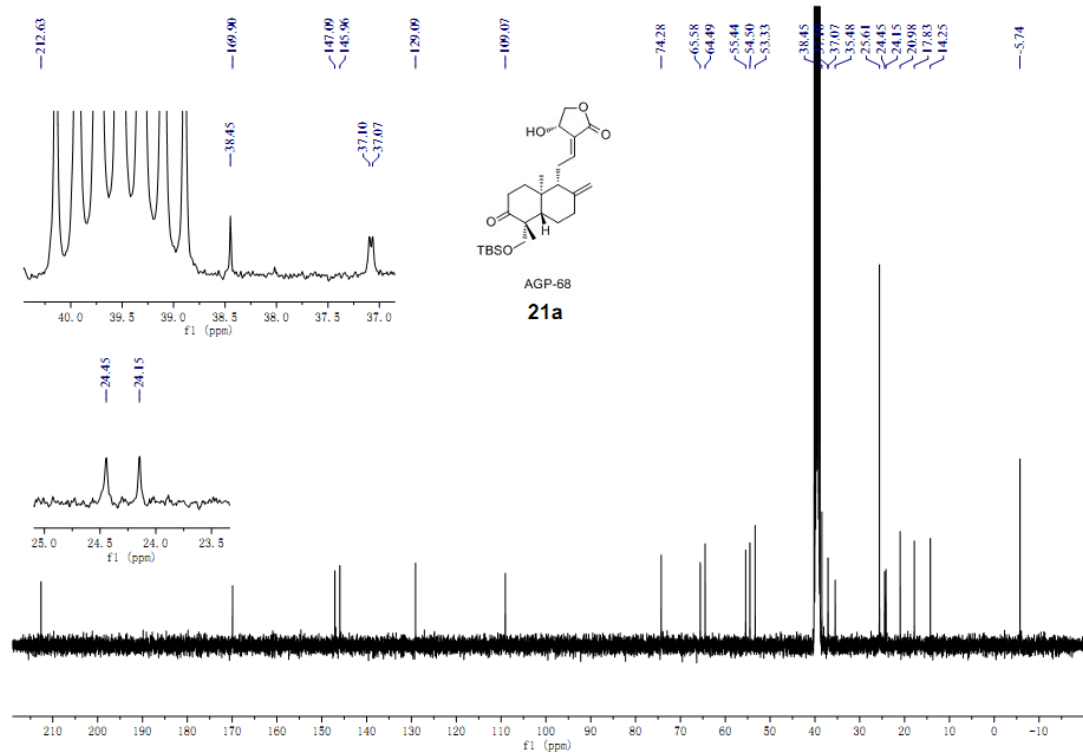

<sup>1</sup>H NMR of compound **21b**:

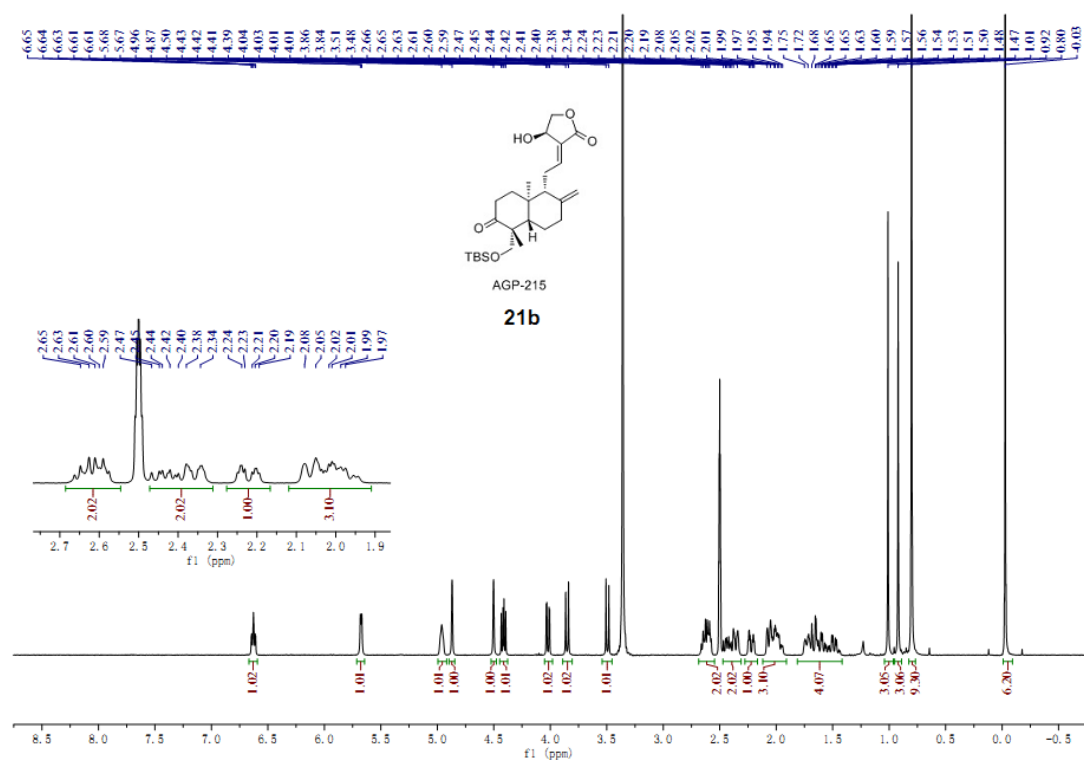

<sup>13</sup>C NMR of compound **21b**:

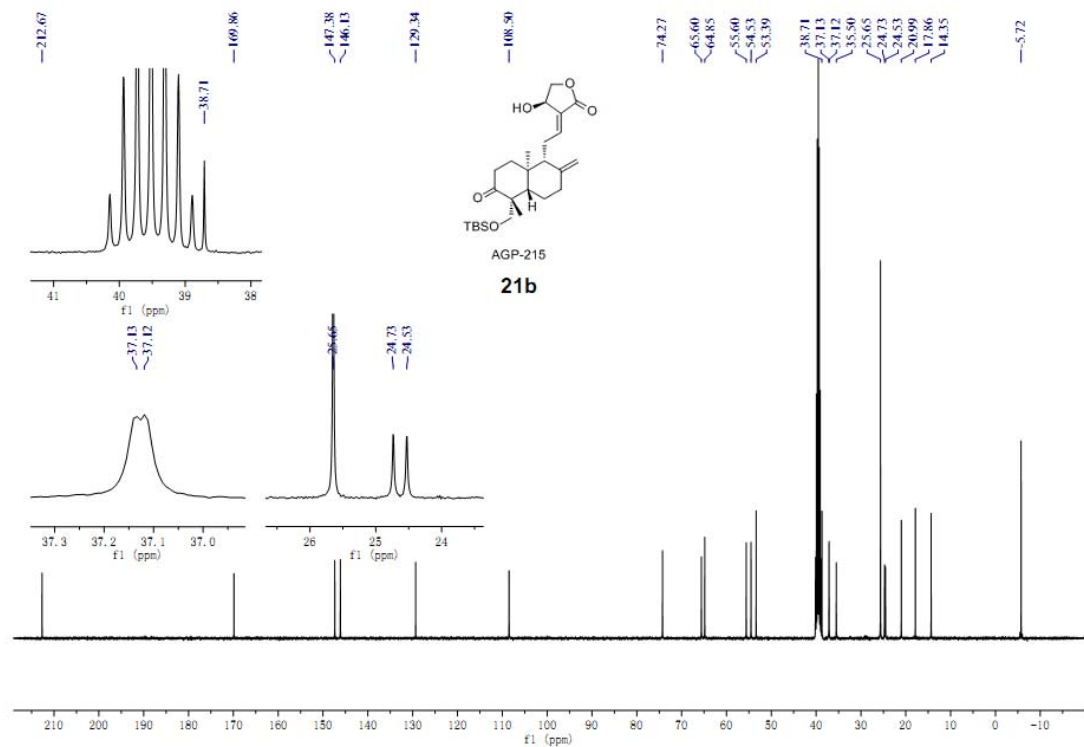

<sup>1</sup>H NMR of compound **22a**:

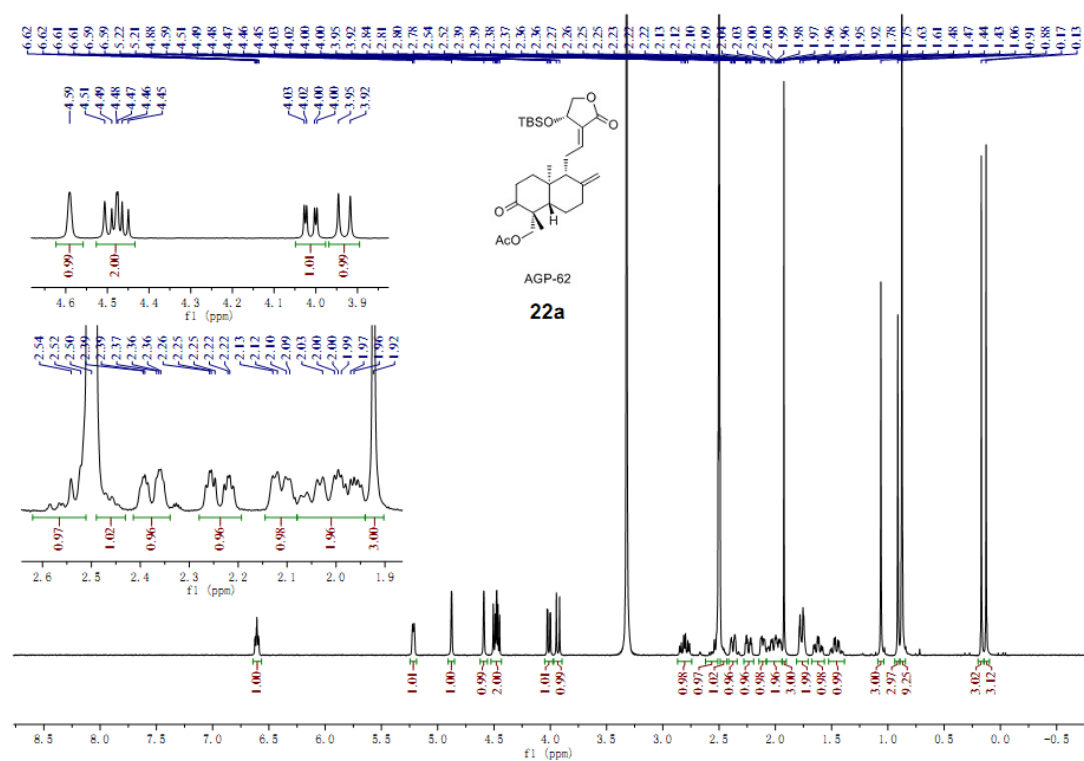

<sup>13</sup>C NMR of compound **22a**:

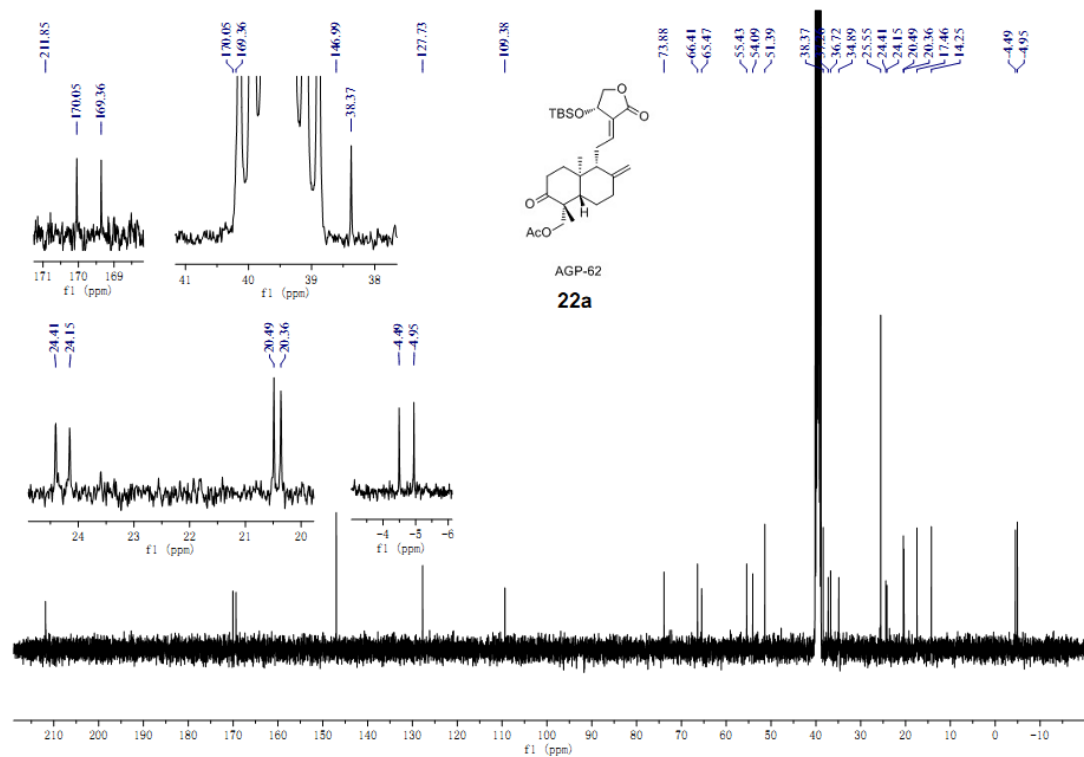

<sup>1</sup>H NMR of compound **22b**:

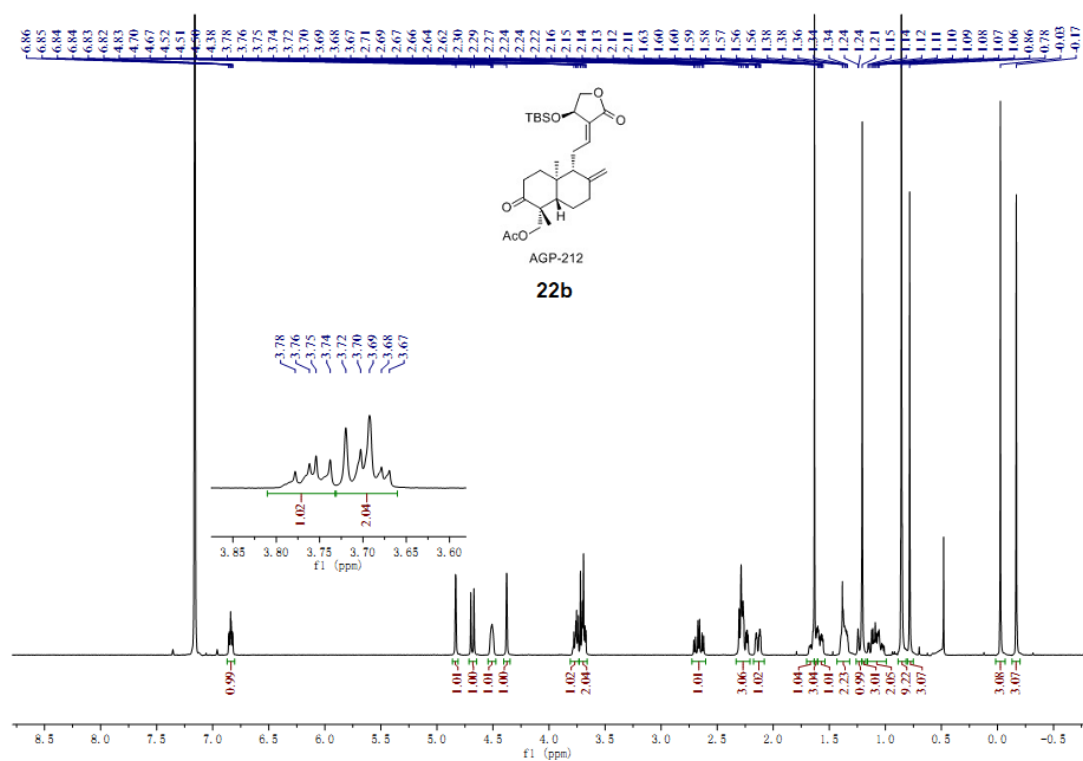

<sup>1</sup>H NMR of compound **23a**:

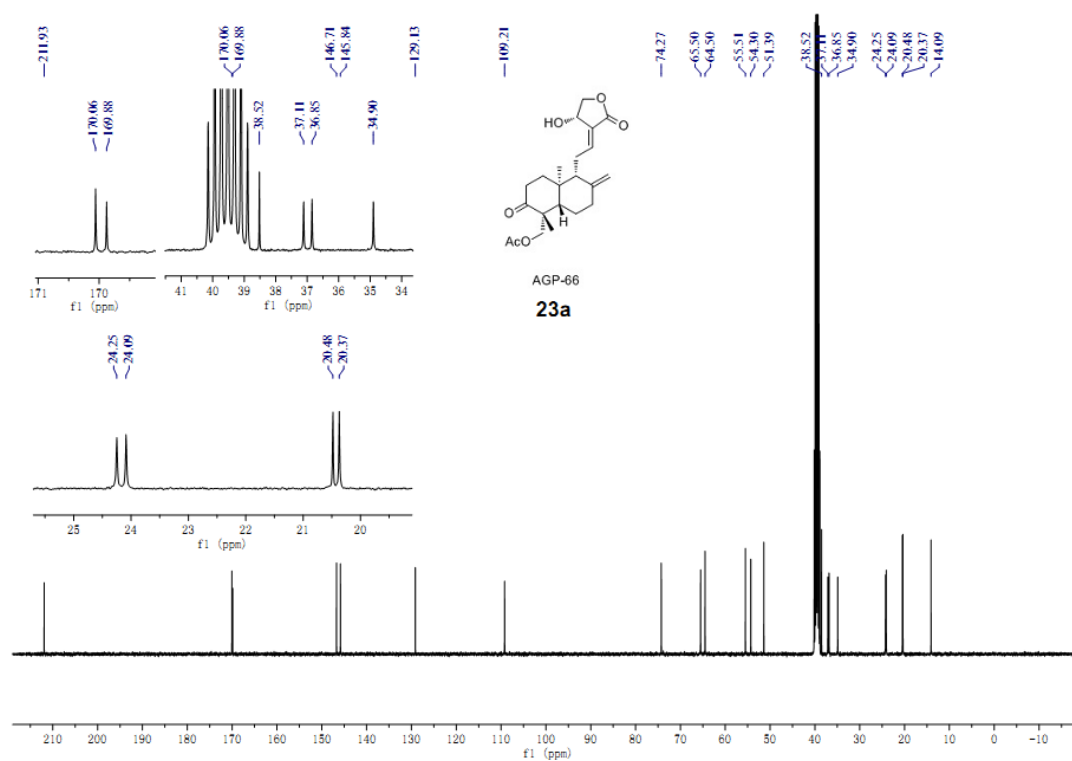

<sup>13</sup>C NMR of compound **23a**:

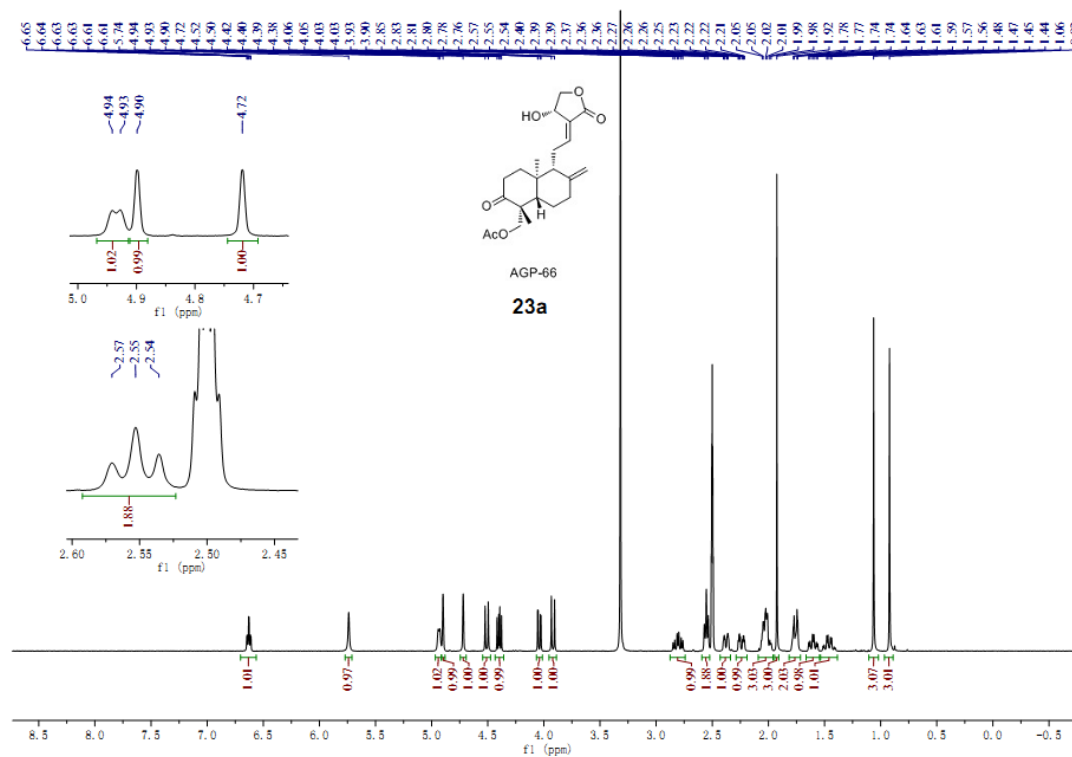



<sup>1</sup>H NMR of compound **23b**:

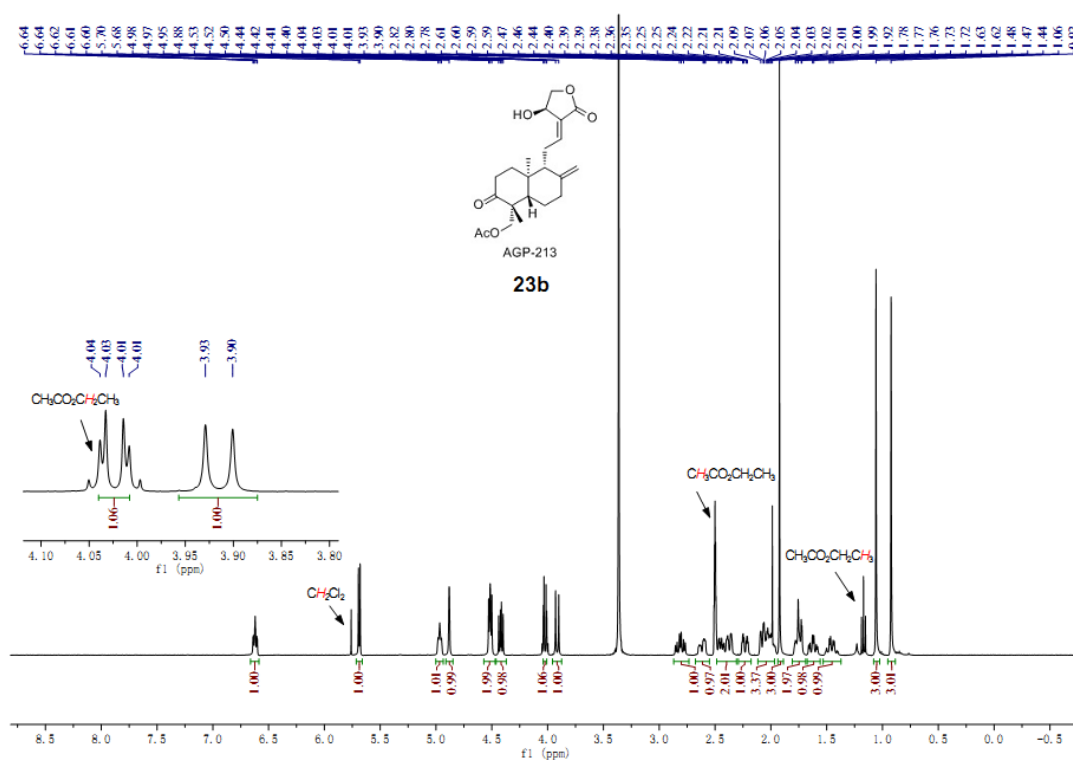

<sup>13</sup>C NMR of compound **23b**:

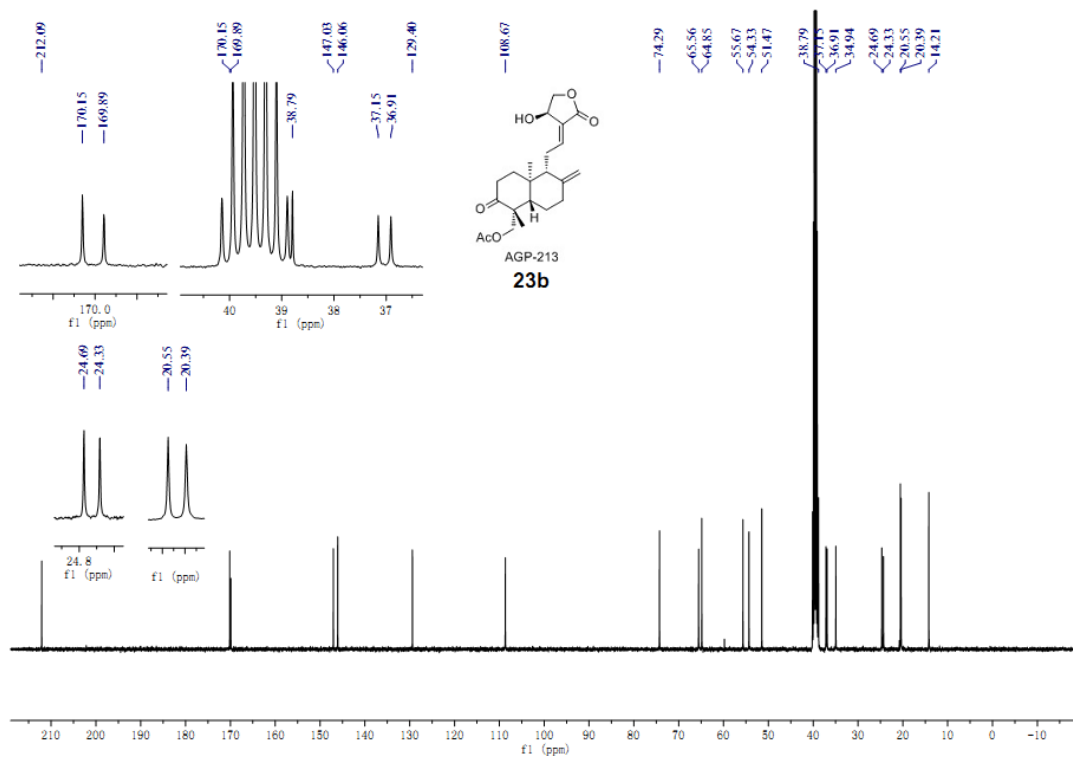

<sup>1</sup>H NMR of compound **24a**:

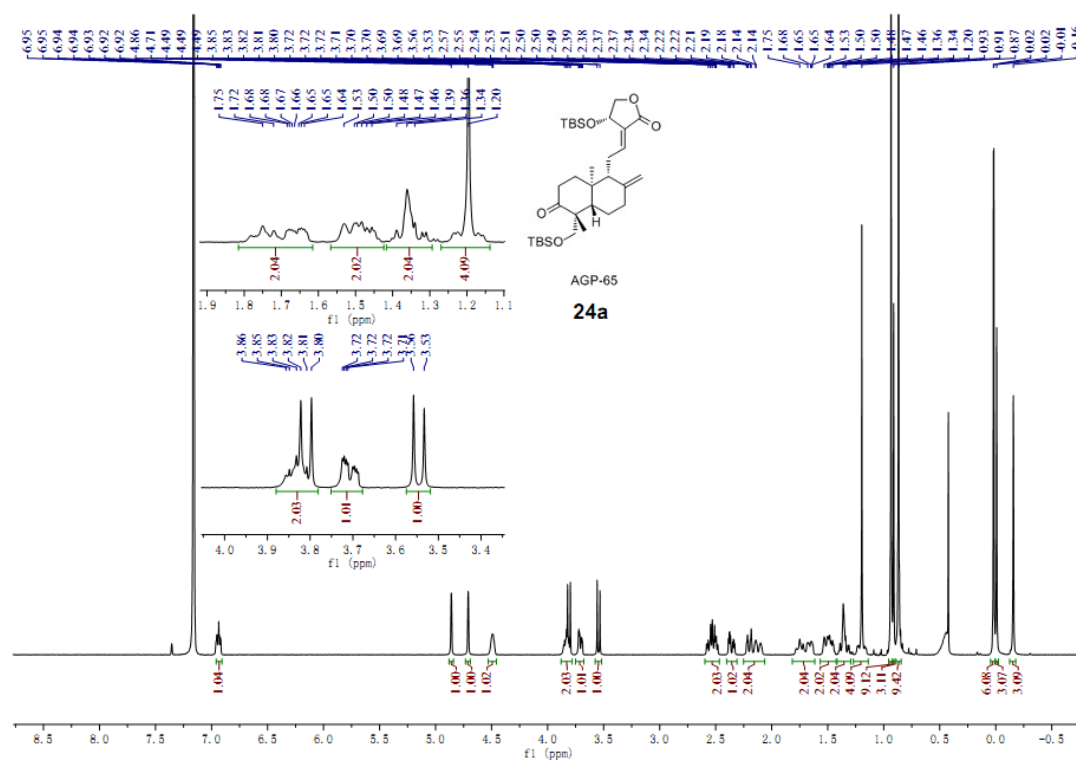

<sup>13</sup>C NMR of compound **24a**:

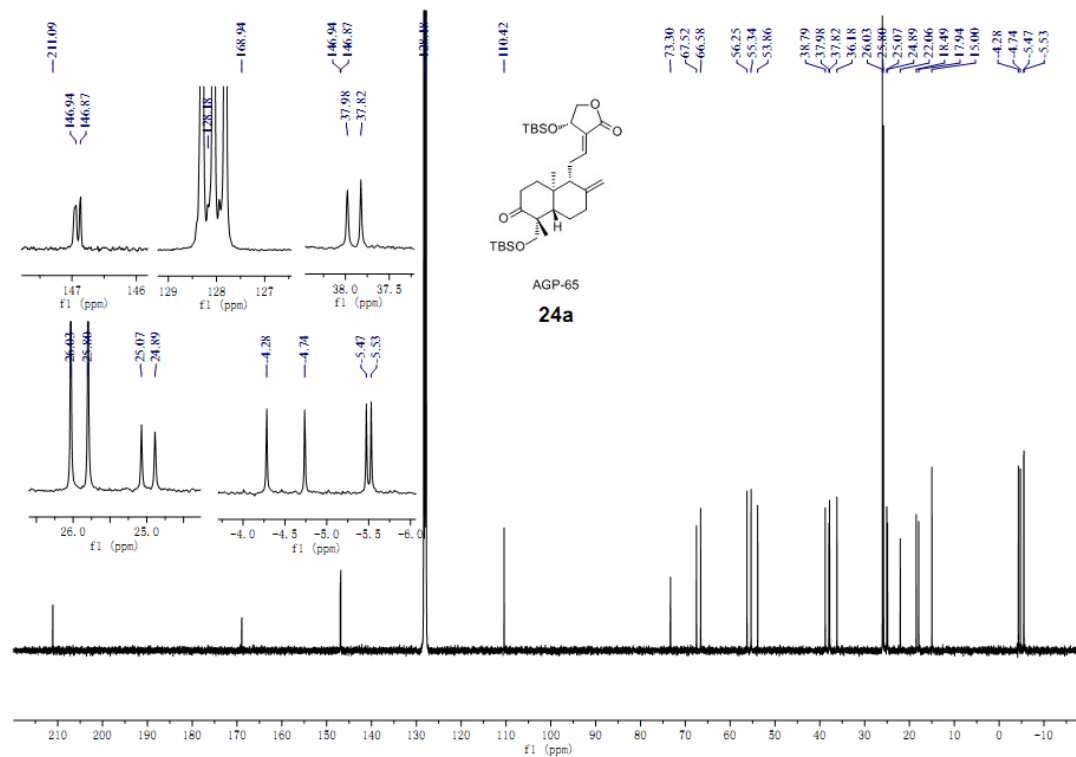

$^1\text{H}$  NMR of compound **24b**:

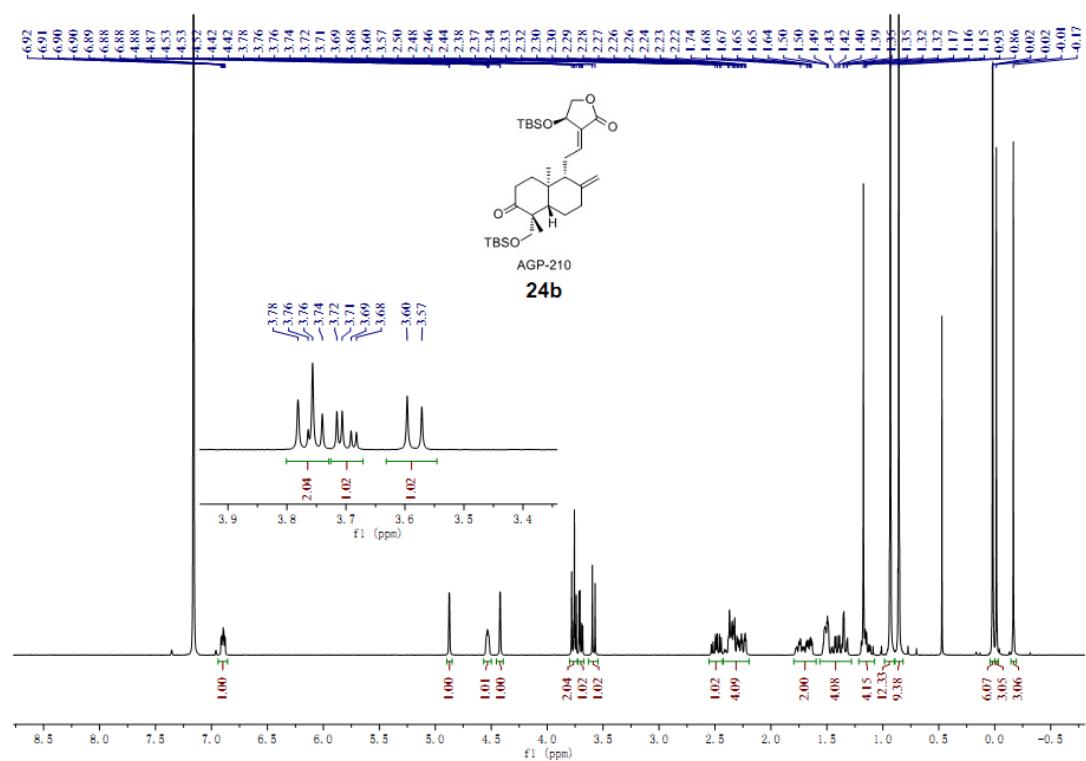

<sup>1</sup>H NMR of compound **25a**:

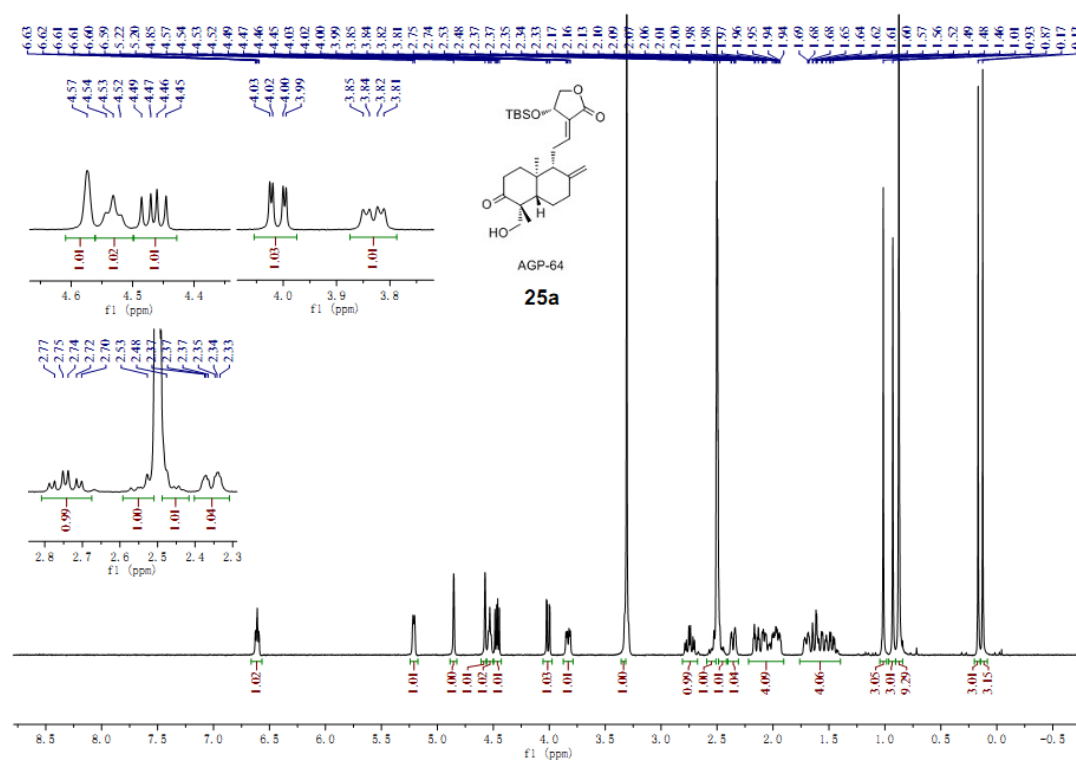

<sup>13</sup>C NMR of compound **25a**:

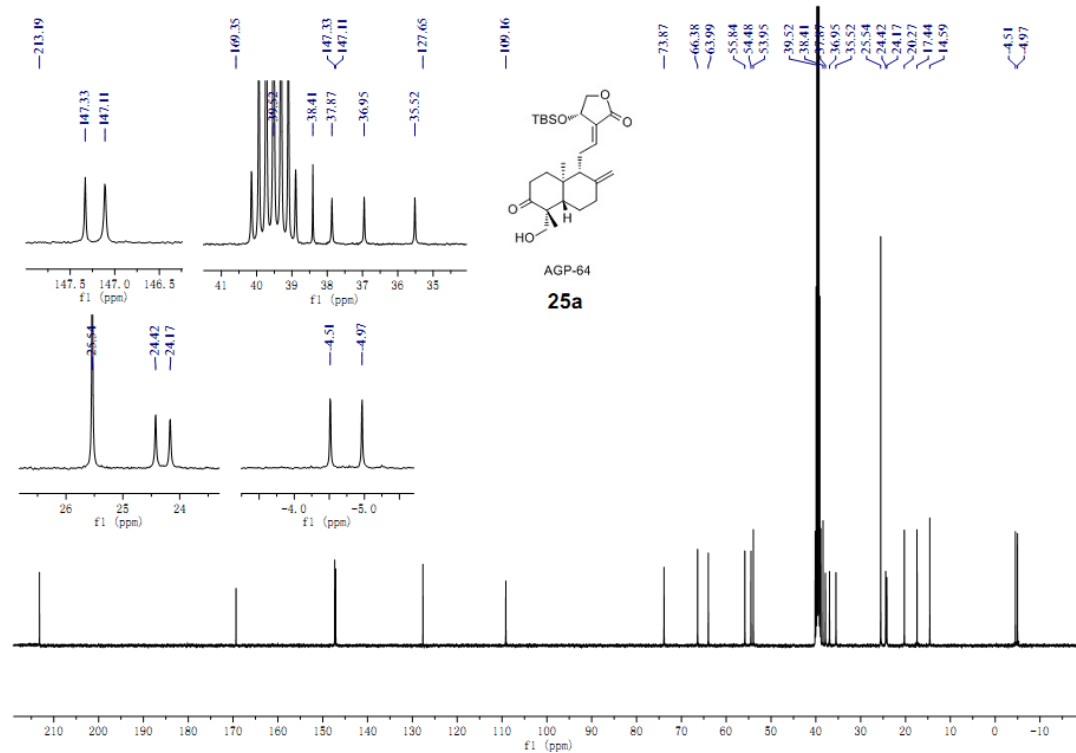

<sup>1</sup>H NMR of compound **25b**:

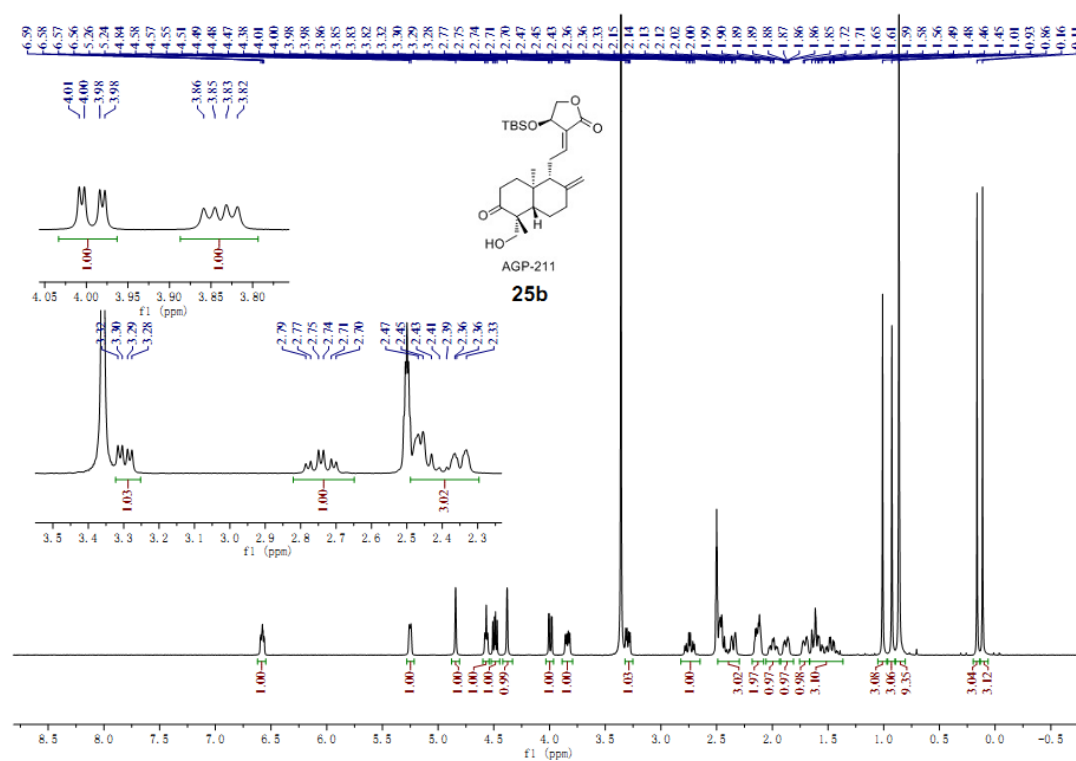

<sup>13</sup>C NMR of compound **25b**:

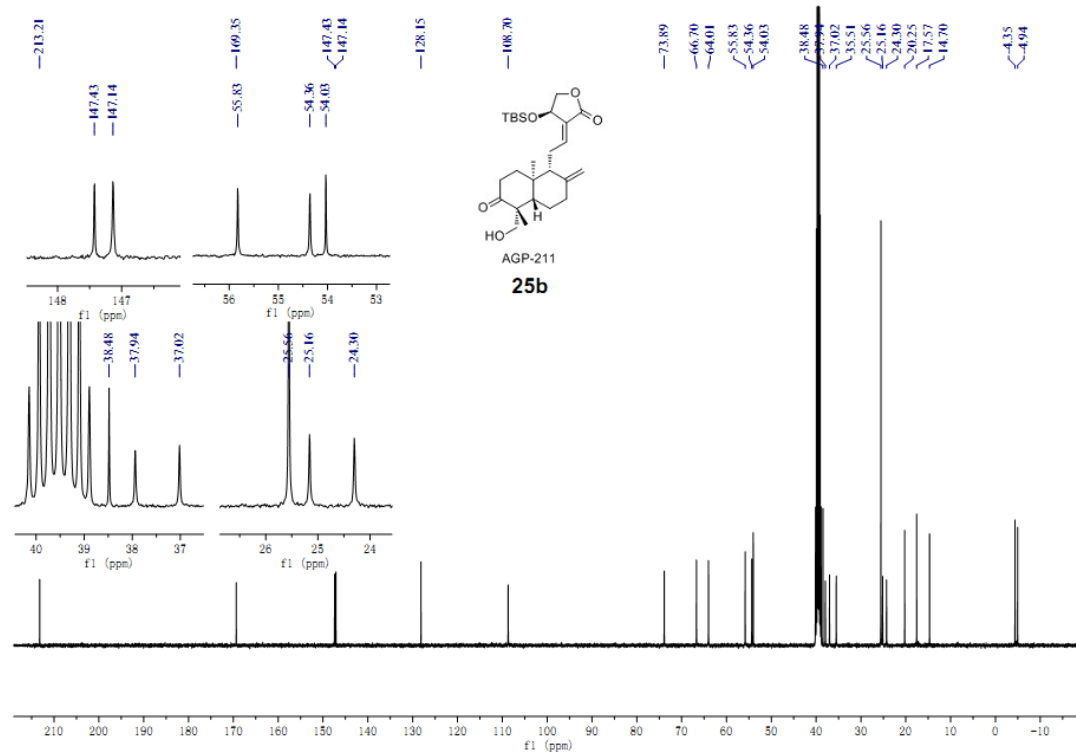

Supplement: c5ra00090d1.pdf [file c5ra00090d1.pdf]
